# Supplementary material for: Achieving redox-responsive organic afterglow materials via a dopant–matrix design strategy
Source: Royal Society of Chemistry journal article supplement (doi:10.1039/d2tc02416k), 2022-01-01
Supplement: d2tc02416k1.pdf [file d2tc02416k1.pdf]

## **Electronic Supplementary Information**

### **Achieving redox-responsive organic afterglow via dopant-matrix design strategy**

*Xuefeng Chen,<sup>#</sup> Guangming Wang,<sup>#</sup> Xiuzheng Chen, Xinjian Deng and Kaka Zhang\**

Key Laboratory of Synthetic and Self-Assembly Chemistry for Organic Functional Molecules, Shanghai Institute of Organic Chemistry, University of Chinese Academy of Sciences, Chinese Academy of Sciences, 345 Lingling Road, Shanghai 200032, People's Republic of China.

\*Email: zhangkaka@sioac.ac.cn

## Table of Contents

### Experimental Contents

**Fig. S1** UV-vis spectra of BF<sub>2</sub>bdk in different solvents. DCM, EA, ACE and THF refer to dichloromethane, ethyl acetate, acetone and tetrahydrofuran, respectively. under 365 nm UV and after removal of 365 nm UV lamp.

**Fig. S2** Room-temperature steady-state emission spectra of BF<sub>2</sub>bdk in different solvents. DCM, EA, ACE and THF refer to dichloromethane, ethyl acetate, acetone and tetrahydrofuran, respectively.

**Fig. S3** Excitation spectra of BF<sub>2</sub>bdk-TPO samples.

**Fig. S4** UV-vis spectra of BF<sub>2</sub>bdk-TPO-0.5% samples.

**Fig. S5** (A) Photographs of the spiroBF<sub>2</sub>-TP-TPO powders with different TPO contents. (B) Delayed emission (1 ms delay) spectra of spiroBF<sub>2</sub>-TP-TPO samples with different TPO contents. TP plus TPO matrices with different TPO contents (0%, 10%, 25%, 50%, 75% and 100%) have been used to accommodate BF<sub>2</sub>bdk. It is found that when the TPO contents increase to 25%, the spiroBF<sub>2</sub>-TP-TPO powders exhibited room-temperature afterglow which can be observed by human eyes in a dark room.

**Fig. S6** S<sub>1</sub> and T<sub>1</sub> levels of DPEBF<sub>2</sub> with different conformation obtained by TD-DFT calculation.

**Fig. S7** (A) Variable-temperature steady-state and (B) delayed emission (1 ms delay) spectra of DPFBF<sub>2</sub>-TPO-0.01% powders.

**Fig. S8** The TD-DFT calculated results of DPEBF<sub>2</sub> singlet and triplet excited states. The  $\Delta E_{ST}$  value is estimated from fluorescence and phosphorescence maxima in Fig. 5 to be 0.46 eV. The energy level of T<sub>2</sub> state is sandwiched between S<sub>1</sub> and T<sub>1</sub>. Therefore, the S<sub>1</sub>-to-T<sub>2</sub> ISC channel with relatively small singlet-triplet energy gap and relatively large SOCME of 2.59 cm<sup>-1</sup> can mediate the intersystem crossing of DPEBF<sub>2</sub> system.

**Fig. S9** The TD-DFT calculated results of fluoreneBF<sub>2</sub> singlet and triplet excited states. The  $\Delta E_{ST}$  value is estimated from fluorescence and phosphorescence maxima in Fig. 5 to be 0.52 eV. The energy level of T<sub>2</sub> state should be sandwiched between S<sub>1</sub> and T<sub>1</sub>. Therefore, the S<sub>1</sub>-to-T<sub>2</sub> ISC channel with relatively small singlet-triplet energy gap and relatively large SOCME of 1.17 cm<sup>-1</sup> can mediate the intersystem crossing of fluoreneBF<sub>2</sub> system.

**Fig. S10** The TD-DFT calculated results of DPFBF<sub>2</sub> singlet and triplet excited states. The TD-DFT calculated results of fluoreneBF<sub>2</sub> singlet and triplet excited states. The  $\Delta E_{ST}$  value is estimated from fluorescence and phosphorescence maxima in Fig. 5 to be 0.48 eV. The energy level of T<sub>2</sub> state should be sandwiched between S<sub>1</sub> and T<sub>1</sub>. Therefore, the S<sub>1</sub>-to-T<sub>2</sub> ISC channel with relatively small singlet-triplet energy gap and relatively large SOCME of 0.60 cm<sup>-1</sup> can mediate the intersystem crossing of DPFBF<sub>2</sub> system.

**Fig. S11** The TD-DFT calculated results of spiroBF<sub>2</sub> singlet and triplet excited states.

**Fig. S12** Single crystal structures of (A) DPEBF<sub>2</sub>, (B) fluoreneBF<sub>2</sub> and (C) spiroBF<sub>2</sub>.

**Fig. S13** <sup>1</sup>H NMR spectra of DPEBF<sub>2</sub>.

**Fig. S14** <sup>13</sup>C NMR spectra of DPEBF<sub>2</sub>.

**Fig. S15** <sup>19</sup>F NMR spectra of DPEBF<sub>2</sub>.

**Fig. S16** <sup>11</sup>B NMR spectra of DPEBF<sub>2</sub>.

**Fig. S17** LRMS and HRMS spectra of DPEBF<sub>2</sub>.

**Fig. S18** FT-IR spectra of DPEBF<sub>2</sub>.

**Fig. S19**  $^1\text{H}$  NMR spectra of DPFBF<sub>2</sub>.

**Fig. S20**  $^{13}\text{C}$  NMR spectra of DPFBF<sub>2</sub>.

**Fig. S21**  $^{19}\text{F}$  NMR spectra of DPFBF<sub>2</sub>.

**Fig. S22**  $^{11}\text{B}$  NMR spectra of DPFBF<sub>2</sub>.

**Fig. S23** MS spectra of DPFBF<sub>2</sub>.

**Fig. S24** FT-IR spectra of DPFBF<sub>2</sub>.

**Fig. S25** HPLC spectrum of DPEBF<sub>2</sub>. UV absorption was monitored at 376 nm.

**Fig. S26** The fluorescence decay profiles of BF<sub>2</sub>bdk in dichloromethane.

**Table S1** Photophysical data of BF<sub>2</sub>bdk compounds at room temperature.

**Table S2** Photophysical data of BF<sub>2</sub>bdk-TPO-0.01% and BF<sub>2</sub>bdk-TPO-0.5% powders at room temperature.

**Table S3** Comparison of the S<sub>1</sub> and T<sub>1</sub> energy levels between TD-DFT results and experimental results.

**Table S4** Crystal data and structure refinement for d8v20637 (DPEBF<sub>2</sub>).

**Table S5** Atomic coordinates ( $\times 10^4$ ) and equivalent isotropic displacement parameters ( $\text{\AA}^2 \times 10^3$ ) for d8v20637 (DPEBF<sub>2</sub>). U(eq) is defined as one third of the trace of the orthogonalized U<sup>ij</sup> tensor.

**Table S6** Bond lengths [ $\text{\AA}$ ] and angles [ $^\circ$ ] for d8v20637 (DPEBF<sub>2</sub>).

**Table S7** Crystal data and structure refinement for mo\_d8v20682\_0m (fluoreneBF<sub>2</sub>).

**Table S8** Atomic coordinates ( $\times 10^4$ ) and equivalent isotropic displacement parameters ( $\text{\AA}^2 \times 10^3$ ) for mo\_d8v20682\_0m (fluoreneBF<sub>2</sub>). U(eq) is defined as one third of the trace of the orthogonalized U<sub>ij</sub> tensor.

**Table S9** Bond lengths [ $\text{\AA}$ ] and angles [ $^\circ$ ] for mo\_d8v20682\_0m (fluoreneBF<sub>2</sub>).

**Table S10** Crystal data and structure refinement for mo\_d8v20638\_0m (SpiroBF<sub>2</sub>).

**Table S11** Atomic coordinates ( $\times 10^4$ ) and equivalent isotropic displacement parameters ( $\text{\AA}^2 \times 10^3$ ) for mo\_d8v20638\_0m (SpiroBF<sub>2</sub>). U(eq) is defined as one third of the trace of the orthogonalized U<sub>ij</sub> tensor.

**Table S12** Bond lengths [ $\text{\AA}$ ] and angles [ $^\circ$ ] for mo\_d8v20638\_0m (SpiroBF<sub>2</sub>).

## Experimental Contents

### Materials

Phenyl ether (>99.0%, Aladdin), 9,9-dimethyl fluorene (98%, Adamas), 9,9-diphenylfluorene (98%, ARK), 9,9'-spirobifluorene (98%, Bide Pharmatech), acetic anhydride (98.5%, Sinopharm Chemical Reagent), boron trifluoride diethyl etherate (98%, TCI), NaClO (reagent, 5%chlorine, Acros), triphenylphosphine (>99.0%, Adamas), triphenylphosphine oxide (98%, Aladdin).

### Synthesis of DPEBF<sub>2</sub> via cascade reaction

Into a round bottom flask were added phenyl ether (0.2 mL, 1.3 mmol), acetic anhydride (2 mL) and boron trifluoride diethyl etherate (0.8 mL). The reaction mixture was heated to 60 °C and stirred for 4 h. Then the reaction was quenched by adding the reaction mixture drop wise into cold water. The precipitates were washed by water for three times and dried under vacuum. The crude product was purified by column chromatography over silica gel using petroleum ether/dichloromethane (1:1) as eluent to give white solids with an isolation yield of 32%. The DPEBF<sub>2</sub> was further purified by three cycles of recrystallization in spectroscopic grade dichloromethane/hexane (CCDC 2159995). <sup>1</sup>H NMR (400 MHz, Chloroform-*d*, relative to Me<sub>4</sub>Si/ppm) δ 8.05 (d, *J* = 2.4 Hz, 1H), 8.03 (d, *J* = 2.2 Hz, 1H), 7.44 (t, *J* = 7.9 Hz, 2H), 7.28 (t, *J* = 6.0 Hz 1H), 7.10 (d, *J* = 8.3 Hz, 2H), 7.04 (d, *J* = 9.0 Hz, 2H), 6.48 (s, 1H), 2.39 (s, 3H). <sup>13</sup>C NMR (100 MHz, Chloroform-*d*) δ 191.05, 181.79, 164.54, 154.58, 131.64, 130.30, 125.43, 124.93, 120.63, 117.51, 96.67, 24.64. <sup>19</sup>F NMR (376 MHz, Chloroform-*d*, 298 K, relative to CFCl<sub>3</sub> /ppm) δ -139.33 (20%), -139.39 (80%). <sup>11</sup>B NMR (128 MHz, Chloroform-*d*, 298 K, relative to BF<sub>3</sub>·Et<sub>2</sub>O /ppm) δ 0.00. FT-IR (KBr, cm<sup>-1</sup>): ν 3149.1, 3069.4, 1589.4, 1543.4, 1505.8, 1489.5, 1439.9, 1425.7, 1379.4, 1356.8, 1313.4, 1249.2, 1218.0, 1199.3, 1178.3, 1148.5, 1129.1, 1088.6, 1062.4, 1023.8, 982.5, 916.9, 879.0, 866.8, 847.0, 809.5, 798.3, 775.3, 749.8, 741.0, 688.9, 623.4, 600.3, 572.3, 487.2, 476.1. LRMS, *m/z* 325.1. HRMS *m/z* found (calcd for C<sub>16</sub>H<sub>13</sub>O<sub>3</sub><sup>10</sup>BF<sub>2</sub>Na<sup>+</sup>): 324.0854 (324.0854).

### Synthesis of fluoreneBF<sub>2</sub> via cascade reaction

Into a round bottom flask were added 9,9-dimethyl fluorene (345 mg, 1.0 mmol), acetic anhydride (5 mL) and boron trifluoride diethyl etherate (0.8 mL). The reaction mixture was heated to 60 °C and stirred for 5 h. Then the reaction was quenched by adding the reaction mixture drop wise into cold water. The precipitates were washed by water for three times and dried under vacuum. The crude product was purified by column chromatography over silica gel using petroleum ether/dichloromethane (1:1) as eluent to give yellow solids with an isolation yield of 50%. The fluoreneBF<sub>2</sub> was further purified by three cycles of recrystallization in spectroscopic grade dichloromethane/hexane. Melting point of fluoreneBF<sub>2</sub> was measured by DSC to be 230 °C. Single crystals of fluoreneBF<sub>2</sub> were also grown from spectroscopic grade dichloromethane/hexane (CCDC 2049504). The synthetic procedures are the same as our previous study (*Adv. Opt. Mater.* **2021**, 2100353).

### Synthesis of DPFBF<sub>2</sub> via cascade reaction

Into a round bottom flask were added 9,9-diphenylfluorene (318.4 mg, 1.0 mmol), acetic anhydride (2 mL) and boron trifluoride diethyl etherate (0.52 mL). The reaction mixture was heated to 60 °C and stirred for 4 h. Then the reaction was quenched by adding the reaction mixture drop wise into cold water. The precipitates were washed by water for three times and dried under vacuum. The crude product was purified by column chromatography over silica gel using petroleum ether/dichloromethane (1:1) as eluent to give yellow solids with an isolation yield of 48%. The DPFBF<sub>2</sub> was further purified by three cycles of recrystallization in spectroscopic grade dichloromethane/hexane. <sup>1</sup>H NMR (400 MHz, DMSO-*d*<sub>6</sub>, relative to Me<sub>4</sub>Si /ppm) δ 8.28 (d, *J* = 8.3 Hz, 1H), 8.23 (d, *J* = 8.2 Hz, 1H), 8.20 (s, 1H), 8.13 (d, *J* = 7.3 Hz, 1H), 7.54-7.44 (m, 3H), 7.36 (s, 1H), 7.33 – 7.25 (m, 6H), 7.16 (d, *J* = 6.7 Hz, 4H), 2.44 (s, 3H). <sup>13</sup>C NMR (100 MHz, Chloroform-*d*) δ 191.49, 182.45, 152.87, 152.30, 147.89, 144.57, 138.14, 130.27, 130.05, 129.29, 128.58, 128.05, 128.00, 127.20, 126.70, 126.56, 121.64, 120.75, 97.39, 65.65, 24.68. <sup>19</sup>F NMR (376 MHz, Chloroform-*d*, 298 K, relative to CFCl<sub>3</sub> /ppm) δ -139.00 (20%), -139.07 (80%). <sup>11</sup>B

NMR (128 MHz, Chloroform-*d*, 298 K, relative to BF<sub>3</sub>·Et<sub>2</sub>O /ppm) δ 0.01. FT-IR (KBr, cm<sup>-1</sup>): ν 3149.1, 3069.4, 1589.4, 1543.4, 1505.8, 1489.5, 1439.9, 1425.7, 1379.4, 1356.8, 1313.4, 1249.2, 1218.0, 1199.3, 1178.3, 1148.5, 1129.1, 1088.6, 1062.4, 1023.8, 982.5, 916.9, 879.0, 866.8, 847.0, 809.5, 798.3, 775.3, 749.8, 741.0, 688.9, 623.4, 600.3, 572.3, 487.2, 476.1. HRMS *m/z* found (calcd for C<sub>29</sub>H<sub>21</sub>O<sub>2</sub>BF<sub>2</sub>NH<sub>4</sub><sup>+</sup>): 486.1978 (486.1977).

### **Synthesis of SpiroBF<sub>2</sub> via cascade reaction**

Into a round bottom flask were added 9,9'-spirobifluorene (500 mg, 1.1 mmol), acetic anhydride (5 mL) and boron trifluoride diethyl etherate (0.8 mL). The reaction mixture was heated to 60 °C and stirred for 5 h. Then the reaction was quenched by adding the reaction mixture dropwise into cold water. The precipitates were washed by water for three times and dried under vacuum. The crude product was purified by column chromatography over silica gel using petroleum ether/dichloromethane (1:1) as eluent to give yellow solids with an isolation yield of 53%. The spiroBF<sub>2</sub> was further purified by three cycles of recrystallization in spectroscopic grade dichloromethane/hexane. Melting point of spiroBF<sub>2</sub> was measured by DSC to be 166 °C. Single crystals of spiroBF<sub>2</sub> were also grown from spectroscopic grade dichloromethane/hexane (CCDC 2049502). The synthetic procedures are the same as our previous study (*Adv. Opt. Mater.* **2021**, 2100353).

### **Preparation of afterglow materials by doping BF<sub>2</sub>bdk into organic matrices**

For the preparation of BF<sub>2</sub>bdk-TPO-0.5% powders, 500 μL BF<sub>2</sub>bdk in dichloromethane (1.0 mg/mL) and 100 mg triphenylphosphine oxide (TPO) were added into an agate mortar (diameter = 5 cm). After grinding and solvent evaporating, BF<sub>2</sub>bdk-TPO-0.5% powders that show afterglow properties were obtained. The other afterglow materials in this study at different doping concentrations, using different BF<sub>2</sub>bdk luminogens and different organic matrices were prepared through similar processes. TP and TPO possess melting points of 78.5-81.5 °C and 154-158 °C, respectively. The BF<sub>2</sub>bdk-matrix powders samples were used to prepare the melt-cast

samples. It is found that the molten matrices can dissolve BF<sub>2</sub>bdk because of the low doping concentrate ions of BF<sub>2</sub>bdk. The melt-cast samples were obtained by heating the powder samples into melt followed by room temperature cooling.

### **Physical measurements and instrumentation**

Nuclear magnetic resonance (NMR) spectra were recorded on a JEOL Fourier-transform NMR spectrometer (400 MHz), including <sup>1</sup>H NMR, <sup>13</sup>C{<sup>1</sup>H} NMR, <sup>19</sup>F{<sup>1</sup>H} NMR, <sup>11</sup>B{<sup>1</sup>H} NMR. Mass spectra were performed on Agilent Technologies 5973N and Thermo Fisher Scientific LTQ FT Ultras mass spectrometer. FT-IR spectra were recorded on a Nicolet AVATAR-360 FT-IR spectrophotometer with a resolution of 4 cm<sup>-1</sup>. Single-crystal X-ray diffraction analysis was performed on a D8 VENTURE SC-XRD instrument. UV-Vis absorption spectra were recorded on a Techcomp UV1050. UV-vis spectrophotometer. The steady-state and delayed emission spectra were collected by Hitachi FL-4700 fluorescence spectrometer equipped with chopping systems; the delayed emission spectra were obtained with a delay time of approximately 1 ms. The excited state decay profiles in millisecond to second region were collected by Hitachi FL-4700 fluorescence spectrometer equipped with chopping systems. The fluorescence decay profiles in nanosecond region were recorded by using time-correlated single photon counting technique (TCSPC) on a Edinburgh FLS1000 fluorescence spectrometer equipped with a picosecond pulsed diode laser. Photoluminescence quantum yield was measured by a Hamamatsu absolute PL quantum yield measurement system based on a standard protocol (*Adv. Mater.* **1997**, *9*, 230). Photographs and videos were captured by HUAWEI P30 cameras. Before the capture, samples were irradiated by a 365 nm UV lamp (5 W) for approximately 5 s at a distance of approximately 15 cm.

### **TD-DFT calculations**

TD-DFT calculations were performed on ORCA 4.2.1 program with B3LYP functional and def2-TZVP(-f) basis set to study the photophysical properties of

molecularly dispersed BF<sub>2</sub>bdk in the solid state. Since the afterglow properties are originated from the excited states of molecularly dispersed BF<sub>2</sub>bdk in the rigid TPO matrices where intermolecular rotation and vibration are largely restricted, the optimized geometry of BF<sub>2</sub>bdk ground state was used for all the TD-DFT calculations. The optimized geometry of BF<sub>2</sub>bdk ground state was obtained by a DFT calculation from its single crystal structure using B3LYP functional and def2-TZVP (-f) basis set. Spin-orbit coupling (SOC) matrix elements between the singlet excited states and triplet excited states were calculated with spin-orbit mean-field (SOMF) methods. The obtained electronic structures were analyzed by Multiwfn software. All isosurface maps to show the electron distribution and electronic transitions were rendered by Visual Molecular Dynamics (VMD) software based on the exported files from Multiwfn. (F. Neese, *Wiley Interdiscip. Rev.: Comput. Mol. Sci.* **2018**, *8*, 1327-1332; A. D. Becke, *Phys. Rev. A* **1988**, *38*, 3098-3100; C. Lee, W. Yang, R. G. Parr, *Phys. Rev. B* **1988**, *37*, 785-789; B. Miehlich, A. Savin, H. Stoll, H. Preuss, *Chem. Phys. Lett.* **1989**, *157*, 200-206; F. Weigend, R. Ahlrichs, *Phys. Chem. Chem. Phys.* **2005**, *7*, 3297-3305; T. Lu, F. Chen, *J. Comput. Chem.* **2012**, *33*, 580-592; W. Humphrey, A. Dalke, K. Schulten, *J. Mol. Graphics* **1996**, *14*, 33-38).

Text S1. About BF<sub>2</sub>bdk aggregation in organic matrices.

Table S2 summarizes the fluorescence maxima and phosphorescence maxima of the emission spectra of BF<sub>2</sub>bdk-TPO-0.01% (Fig. 5A) and BF<sub>2</sub>bdk-TPO-0.5% (Fig. 2A) samples. It is found that the emission maxima in the steady-state emission spectra



showed red-shifted behaviors when increasing the doping concentration from 0.01% to 0.5%. These suggest the molecular aggregation of BF<sub>2</sub>bdk in organic matrices at 0.5% doping concentrations; at 0.01% doping concentration, the BF<sub>2</sub>bdk compounds should be molecularly dispersed in the matrices. In the case of DPFBF<sub>2</sub>-TPO, the DPFBF<sub>2</sub>-TPO-0.5% powders ( $\lambda_F$ , 463 nm) showed significant red shift in the steady-state emission spectra when compared to the DPFBF<sub>2</sub>-TPO-0.01% powders ( $\lambda_F$ , 440 nm). Besides, the ratio of delayed fluorescence band/phosphorescence band of DPFBF<sub>2</sub>-TPO-0.5% powders is smaller than that of DPFBF<sub>2</sub>-TPO-0.01% powders. These can be explained as: BF<sub>2</sub>bdk aggregates cause red shift of steady-state emission spectra but have a less contribution to delayed fluorescence than monomeric dopants, which agree with our previous studies (*Angew. Chem. Int. Ed.* **2021**, *60*, 17138; *Chem. Eng. J.* **2022**, *431*, 134197).

Text S2. Dipole-dipole interactions for the population of triplet excited states.

Because of the dipole-dipole interaction between BF<sub>2</sub>bdk's S<sub>1</sub> states and TPO matrices, both ISC and RISC can be enhanced in BF<sub>2</sub>bdk-TPO systems, and TADF afterglow has also been switched on. For the population of triplet states in organic systems with the involvement of TADF (*Adv. Mater.* **2014**, *26*, 7931), it can be expressed as  $d[T_1]/dt = k_{ISC} [S_1] - (k_{RISC} + k_P + k_{nr}) [T_1]$ . In most organic systems (including the BF<sub>2</sub>bdk-matrix system in the present study), [S<sub>1</sub>] should be much larger than or on the same order of magnitude to [T<sub>1</sub>]. Meanwhile,  $k_{ISC}$  is much larger than  $k_{RISC}$ . Because of these, the equation shows that the increase of  $k_{ISC}$  would lead to

relatively large increase of  $T_1$  population, while the increase of  $k_{\text{RISC}}$  only leads to relatively small decrease of  $T_1$  population. Overall, the dipole-dipole interaction between BF<sub>2</sub>bdk's  $S_1$  states and TPO matrices leads to the increase of  $T_1$  population and consequently the emergence of organic afterglow in the present study when TP is oxidized into TPO.

Text S3. TP matrices can also provide rigid microenvironments to inhibit nonradiative deactivation of dopants' triplets and protect dopants' triplets from oxygen quenching in the reported studies (*Angew. Chem. Int. Ed.* **2020**, *59*, 16054). We didn't emphasize this because the BF<sub>2</sub>bdk-TP samples showed insignificant organic afterglow. The absence of organic afterglow of BF<sub>2</sub>bdk-TP samples is caused by the lack of dipole-dipole interactions between BF<sub>2</sub>bdk and TP and consequently inefficient intersystem crossing of BF<sub>2</sub>bdk.

Text S4. The comparison between TD-DFT results and experimental results

Table S3 summarizes the energy levels of  $S_1$  and  $T_1$  for the comparison between TD-DFT results and experimental results. In this study, TD-DFT calculations were performed on ORCA 4.2.1 program with B3LYP functional and def2-TZVP(-f) basis set. The optimized geometry of BF<sub>2</sub>bdk's ground state was used for TD-DFT calculations. In this study (in the case of fluoreneBF<sub>2</sub> and spiroBF<sub>2</sub>) and our previous studies on BF<sub>2</sub>bdk-matrix systems (*ACS Appl. Mater. Interfaces* **2022**, *14*, 1587), it has been found that BF<sub>2</sub>bdk's  $T_1$  energy levels calculated by TD-DFT are close to

those estimated from their phosphorescence maxima. Because of this, we use phosphorescence maxima to estimate BF<sub>2</sub>bdk's T<sub>1</sub> energy levels in the present study. For BF<sub>2</sub>bdk's S<sub>1</sub> energy levels, it has been found that the S<sub>1</sub> energy levels calculated by TD-DFT match the experimental UV-vis absorption maxima in this study (for example, in the case of fluoreneBF<sub>2</sub> and DPFBF<sub>2</sub>) and also in our previous studies (*Angew. Chem. Int. Ed.* **2021**, *60*, 17138; *Adv. Funct. Mater.* **2021**, 2110207). So we use these S<sub>1</sub> energy levels and their electron-hole isosurface maps, as well as the UV-vis absorption spectra, to study the absorption properties of BF<sub>2</sub>bdk solutions. It is noted that, because of the Stokes shift, the S<sub>1</sub> energy levels estimated from the fluorescence maxima are significantly lower than those calculated by TD-DFT using BF<sub>2</sub>bdk's ground state geometry.

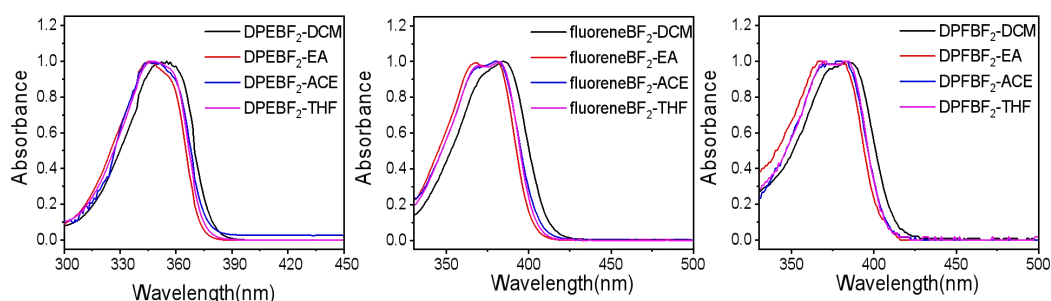

**Fig. S1.** UV-vis spectra of BF<sub>2</sub>bdk in different solvents. DCM, EA, ACE and THF refer to dichloromethane, ethyl acetate, acetone and tetrahydrofuran, respectively. In the case of DPEBF<sub>2</sub>, fluoreneBF<sub>2</sub> and DPFBF<sub>2</sub>, the electron-hole isosurface map of the S<sub>1</sub> states (by TD-DFT calculations, vide infra) showed intramolecular charge transfer plus localized excitation characters. Their UV-vis absorption spectra showed intense absorption bands with some structures, which also suggest the intramolecular charge transfer plus localized excitation characters in DPEBF<sub>2</sub>, fluoreneBF<sub>2</sub> and DPFBF<sub>2</sub> systems.

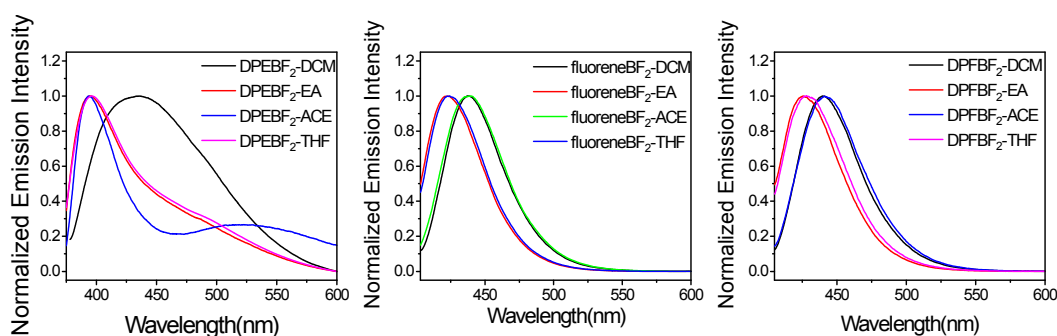

**Fig. S2.** Room-temperature steady-state emission spectra of  $\text{BF}_2\text{bdk}$  in different solvents. DCM, EA, ACE and THF refer to dichloromethane, ethyl acetate, acetone and tetrahydrofuran, respectively. For the emission spectra of  $\text{DPEBF}_2$  solutions, we have repeated the measurements. It turns out that the emission spectra of  $\text{DPEBF}_2$  in dichloromethane are broad.  $\text{DPEBF}_2$  possess ICT characters. The free-rotating single bonds of O-C-O functional group and C-C bonds between boron(III) diketonate and aromatic moiety allow  $\text{DPEBF}_2$  molecule to adopt diverse conformation. These motivate us to propose that  $\text{DPEBF}_2$  in dichloromethane shows twisted intramolecular charge transfer (TICT) emission characters (*J. Phys. Chem. C* **2016**, *120*, 22539).

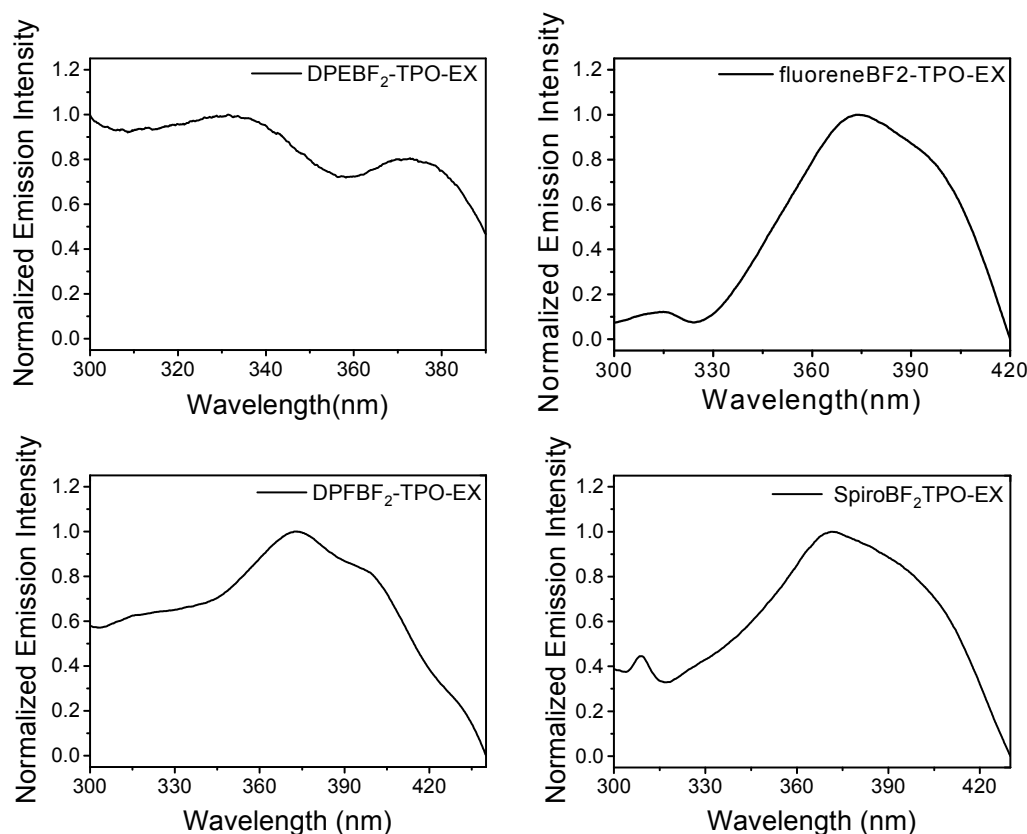

**Fig. S3.** Excitation spectra of  $\text{BF}_2\text{bdk-TPO}$  samples.

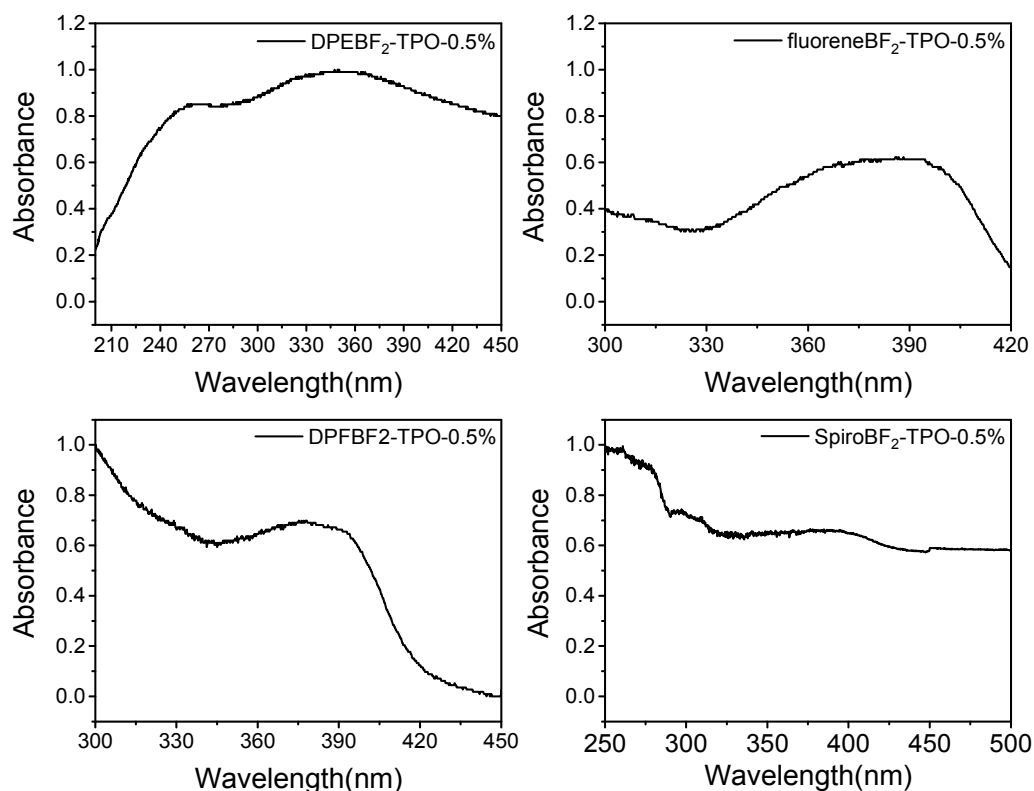

**Fig. S4.** UV-vis spectra of BF<sub>2</sub>bdk-TPO-0.5% samples.

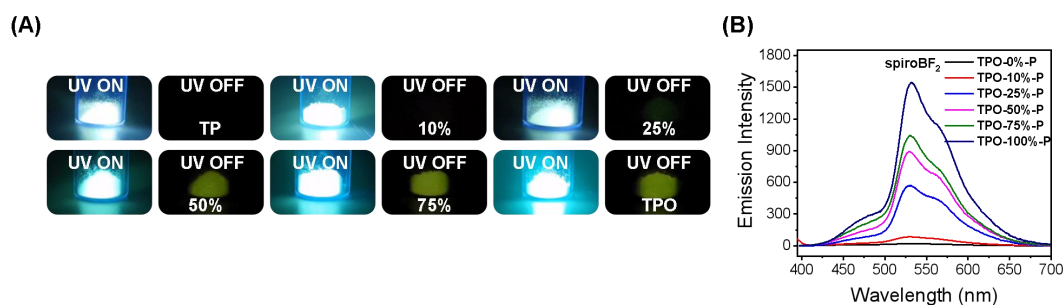

**Fig. S5.** (A) Photographs of the spiroBF<sub>2</sub>-TP-TPO powders with different TPO contents. (B) Delayed emission (1 ms delay) spectra of spiroBF<sub>2</sub>-TP-TPO samples with different TPO contents. TP plus TPO matrices with different TPO contents (0%, 10%, 25%, 50%, 75% and 100%) have been used to accommodate BF<sub>2</sub>bdk. It is found that when the TPO contents increase to 25%, the spiroBF<sub>2</sub>-TP-TPO powders exhibited room-temperature afterglow which can be observed by human eyes in a dark room.

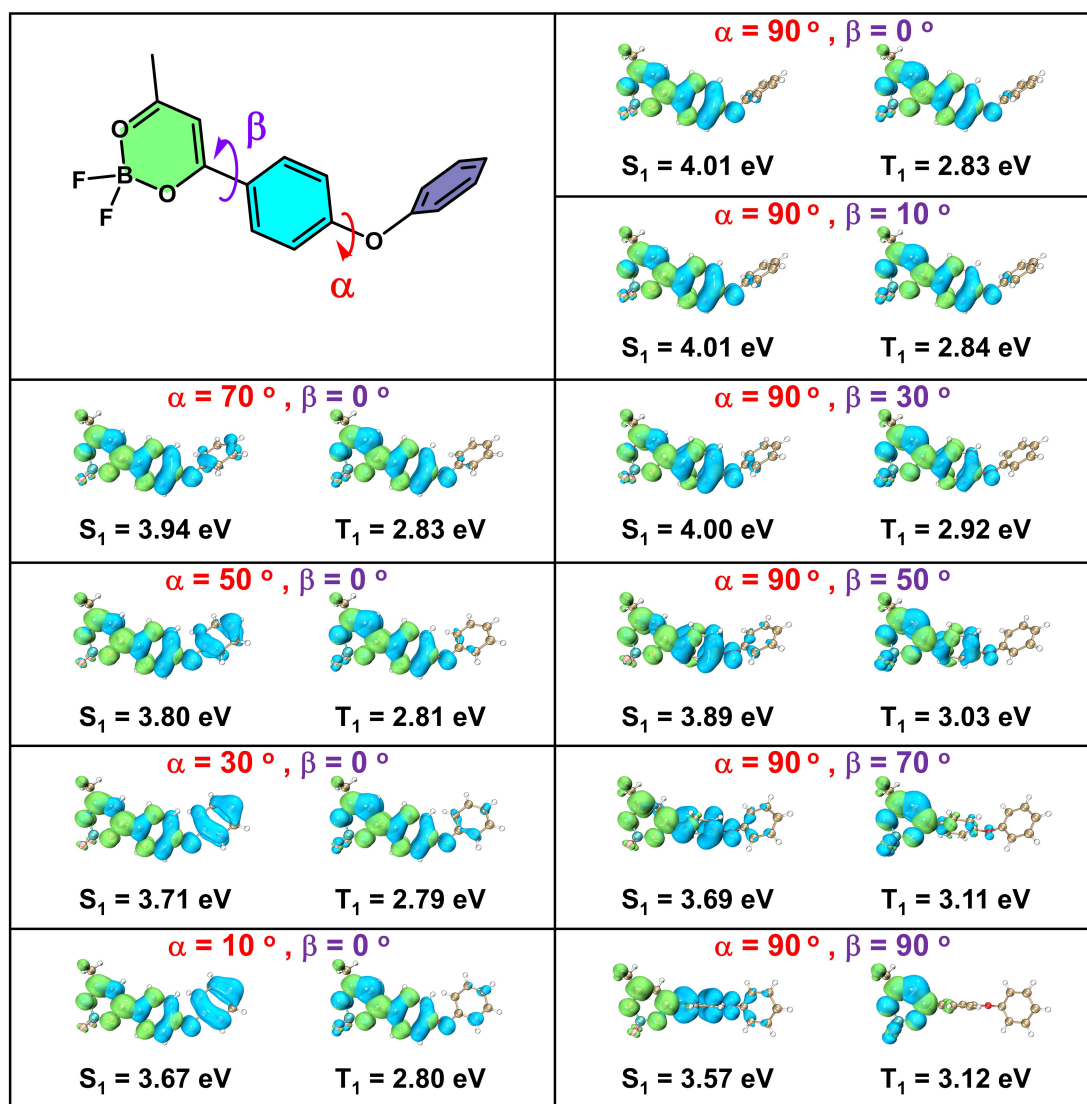

**Fig. S6.**  $S_1$  and  $T_1$  levels of DPEBF<sub>2</sub> with different conformation obtained by TD-DFT calculation. The conformation is defined by the twisted angles (that is, the dihedral angles)  $\alpha$  and  $\beta$ . In the main text, the fluorescence maxima of DPEBF<sub>2</sub> showed insignificant change in TPO and TP (Fig. 5); it is proposed that twist-induced spectral shifts offset the effect of dipole-dipole interactions. Dipole-dipole interactions between TPO and DPEBF<sub>2</sub>'s  $S_1$  state lead to red-shifted fluorescence. By TD-DFT calculations, it is found that the increase of twist angle  $\alpha$  leads to the increase of  $S_1$  levels and insignificant change of  $T_1$  levels, while the increase of twist angle  $\beta$  leads to the decrease of  $S_1$  levels and increase of  $T_1$  levels. Since the phosphorescence maxima in the delayed emission spectra of DPEBF<sub>2</sub>-TPO-0.01% powders were similar to those of DPEBF<sub>2</sub>-TP-0.01% powders (Fig. 5). We propose that DPEBF<sub>2</sub> in TPO matrices possesses a larger twist angle  $\alpha$ , that is, a more twisted conformation

than in TP matrices; the twisted conformation lead to blue-shifted fluorescence. Therefore, in the case of DPEBF<sub>2</sub>, the twist-induced spectral shifts offset the effect of dipole-dipole interactions. It is noted that, although the S<sub>1</sub> and T<sub>1</sub> levels by TD-DFT calculations may be different from those estimated from emission spectra, the trend of S<sub>1</sub> and T<sub>1</sub> levels by systematically varying the twisted angles can still be used to interpret the spectral observations in DPEBF<sub>2</sub>-TPO and DPEBF<sub>2</sub>-TP samples. We think it is understandable that this trend of S<sub>1</sub> and T<sub>1</sub> levels can still support our statement “it is proposed that twist-induced spectral shifts offset the effect of dipole-dipole interactions” in the main text.

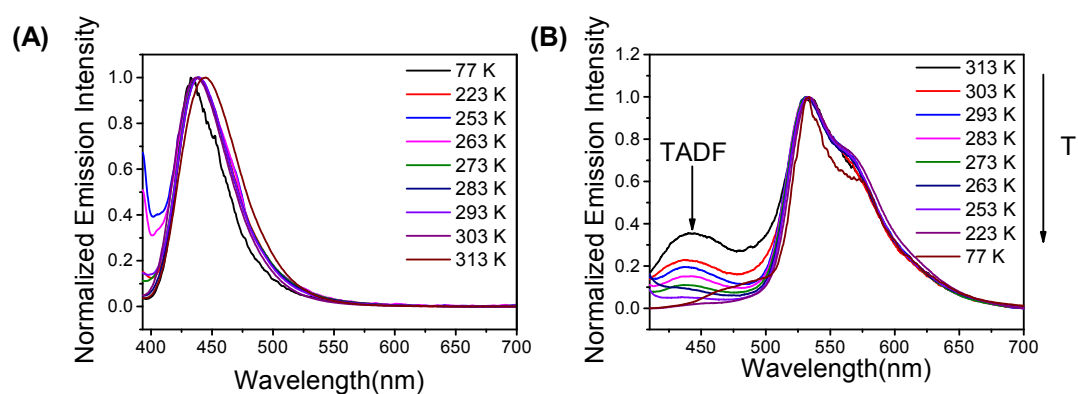

**Fig. S7.** (A) Variable-temperature steady-state and (B) delayed emission (1 ms delay) spectra of DPFBF<sub>2</sub>-TPO-0.01% powders.

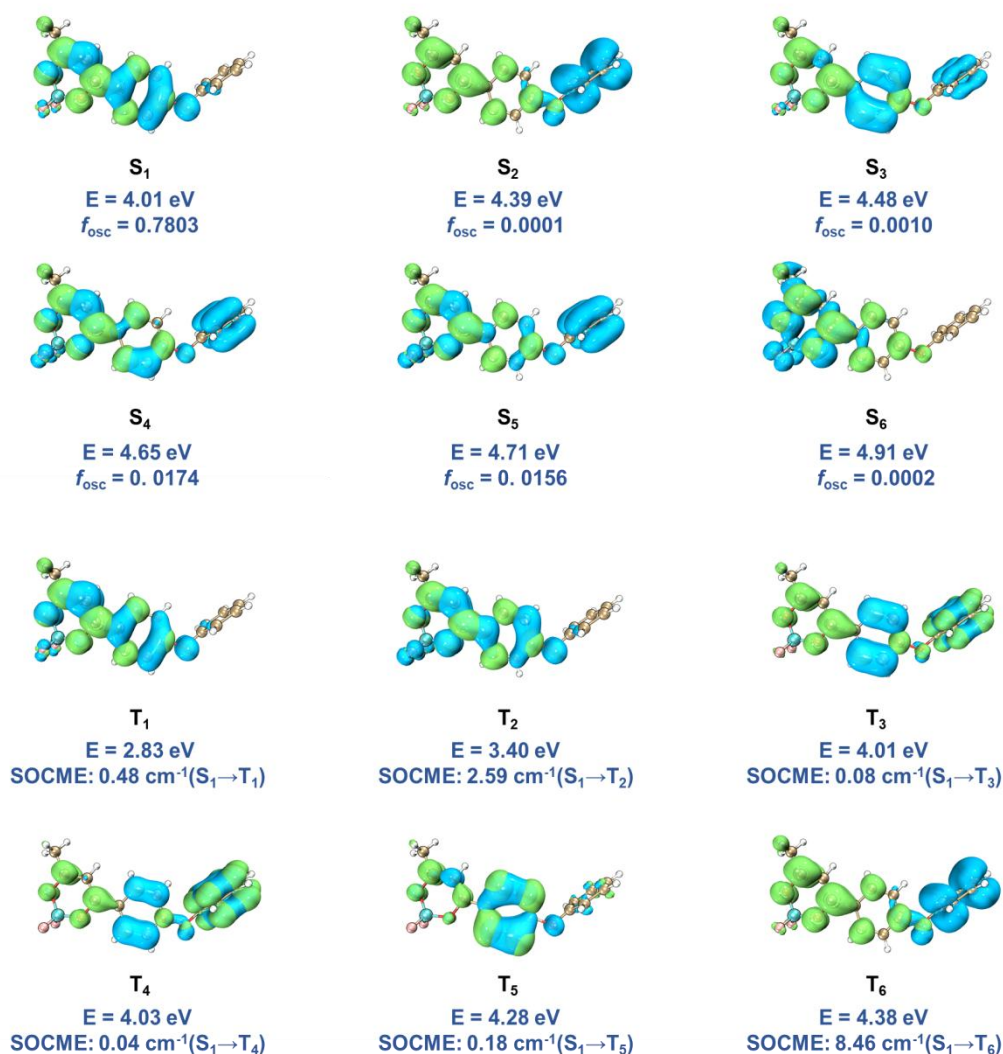

**Fig. S8.** The TD-DFT calculated results of DPEBF<sub>2</sub> singlet and triplet excited states. The  $\Delta E_{\text{ST}}$  value is estimated from fluorescence and phosphorescence maxima in Fig. 5 to be 0.46 eV. The energy level of T<sub>2</sub> state is sandwiched between S<sub>1</sub> and T<sub>1</sub>. Therefore, the S<sub>1</sub>-to-T<sub>6</sub> ISC channel with relatively small singlet-triplet energy gap and relatively large SOCME of 8.46 cm<sup>-1</sup> can mediate the intersystem crossing of DPEBF<sub>2</sub> system.



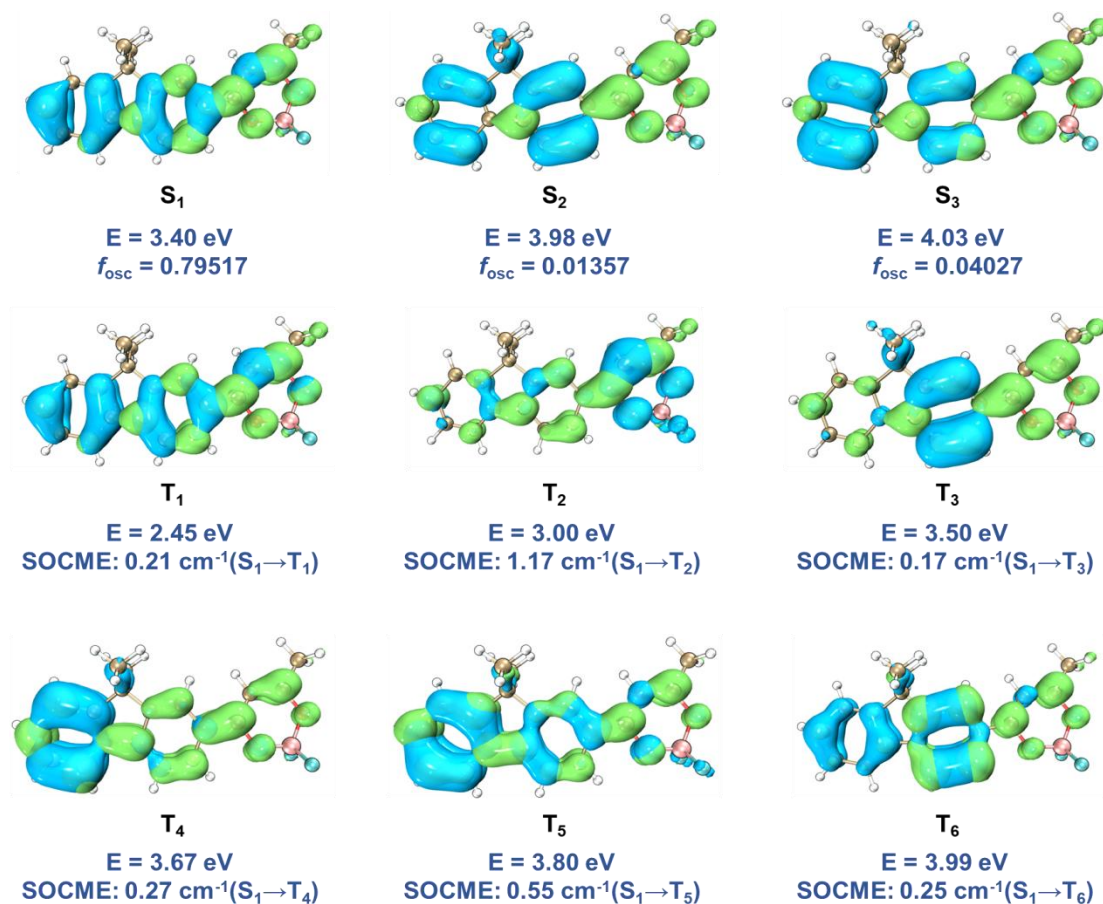

**Fig. S9.** The TD-DFT calculated results of fluoreneBF<sub>2</sub> singlet and triplet excited states. The  $\Delta E_{\text{ST}}$  value is estimated from fluorescence and phosphorescence maxima in Fig. 5 to be 0.52 eV. The energy level of T<sub>2</sub> state should be sandwiched between S<sub>1</sub> and T<sub>1</sub>. Therefore, the S<sub>1</sub>-to-T<sub>2</sub> ISC channel with relatively small singlet-triplet energy gap and relatively large SOCME of 1.17 cm<sup>-1</sup> can mediate the intersystem crossing of fluoreneBF<sub>2</sub> system.

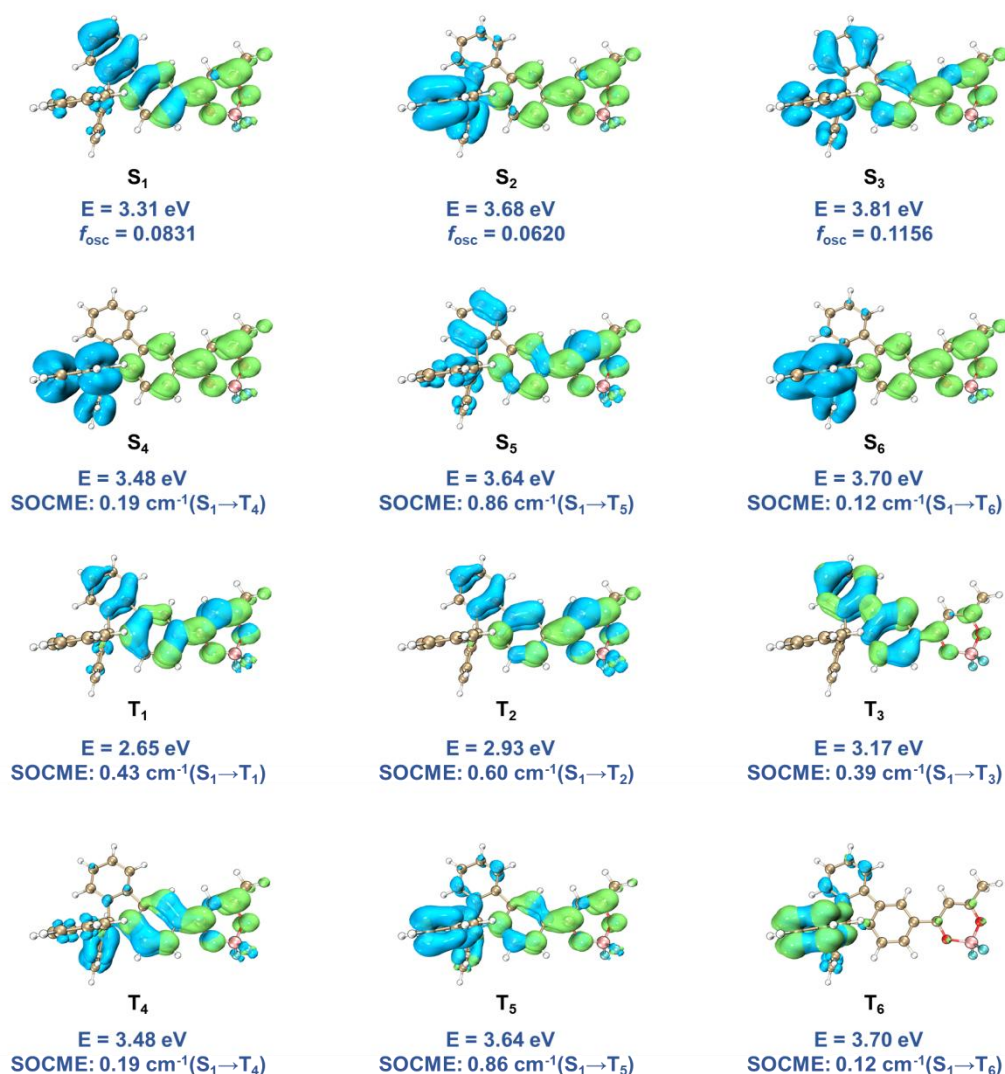

**Fig. S10.** The TD-DFT calculated results of DPFBF<sub>2</sub> singlet and triplet excited states. The TD-DFT calculated results of fluoreneBF<sub>2</sub> singlet and triplet excited states. The  $\Delta E_{ST}$  value is estimated from fluorescence and phosphorescence maxima in Fig. 5 to be 0.48 eV. The energy level of T<sub>2</sub> state should be sandwiched between S<sub>1</sub> and T<sub>1</sub>. Therefore, the S<sub>1</sub>-to-T<sub>5</sub> ISC channel with relatively small singlet-triplet energy gap and relatively large SOCME of 0.86 cm<sup>-1</sup> can mediate the intersystem crossing of DPFBF<sub>2</sub> system.

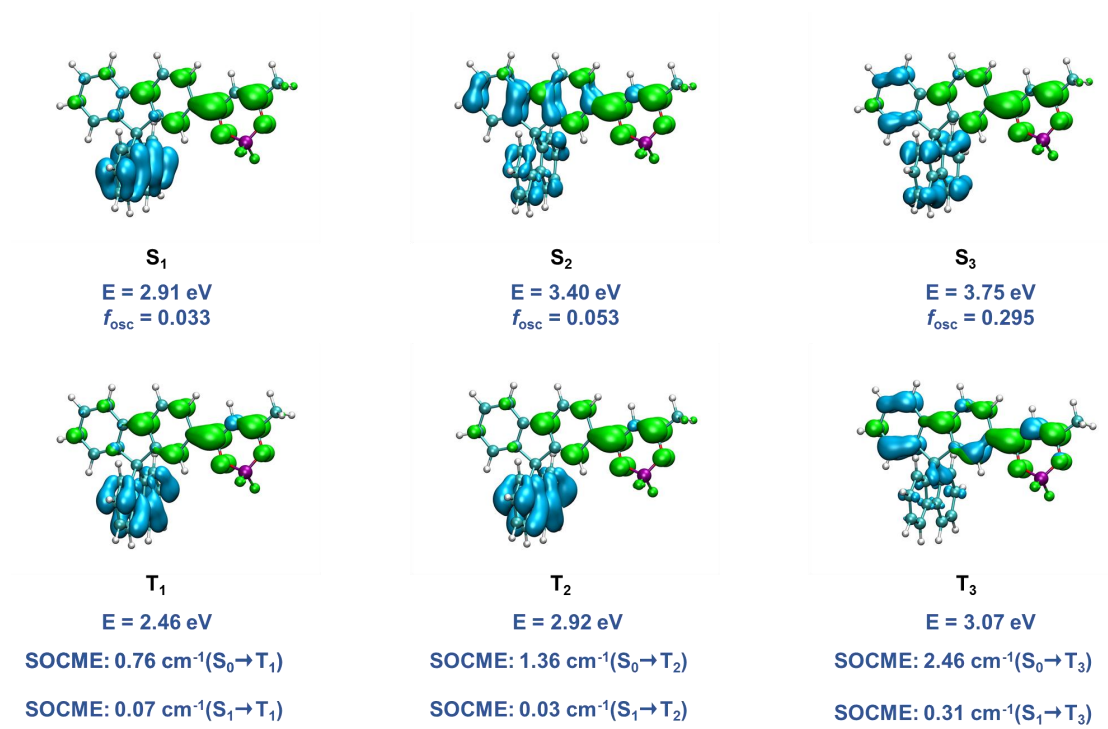

**Fig. S11.** The TD-DFT calculated results of spiroBF<sub>2</sub> singlet and triplet excited states. The S<sub>1</sub>-to-T<sub>3</sub> ISC channel with relatively small singlet-triplet energy gap and relatively large SOCME of 0.31 cm<sup>-1</sup> can mediate the intersystem crossing of spiroBF<sub>2</sub> system.

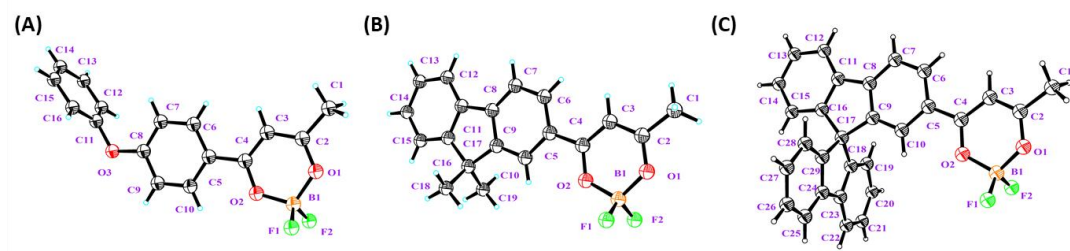

**Fig. S12.** Single crystal structures of (A) DPEBF<sub>2</sub>, (B) fluoreneBF<sub>2</sub> and (C) spiroBF<sub>2</sub>.

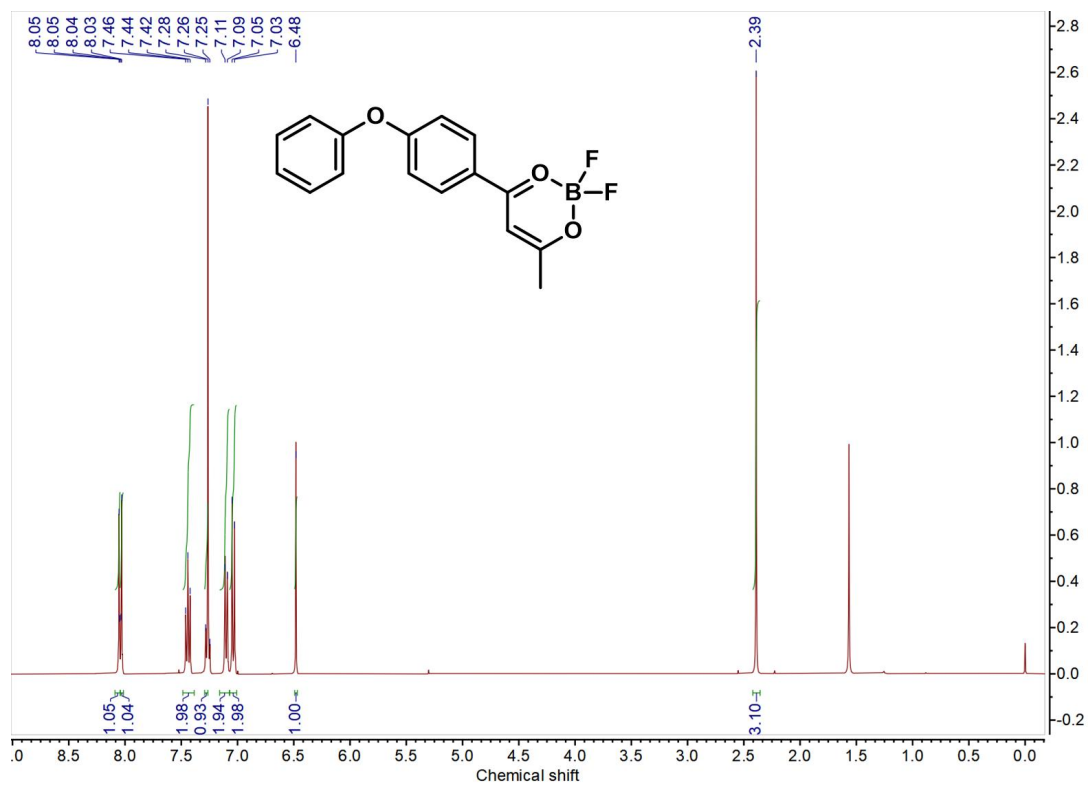

Fig. S13. <sup>1</sup>H NMR spectra of DPEBF<sub>2</sub>.

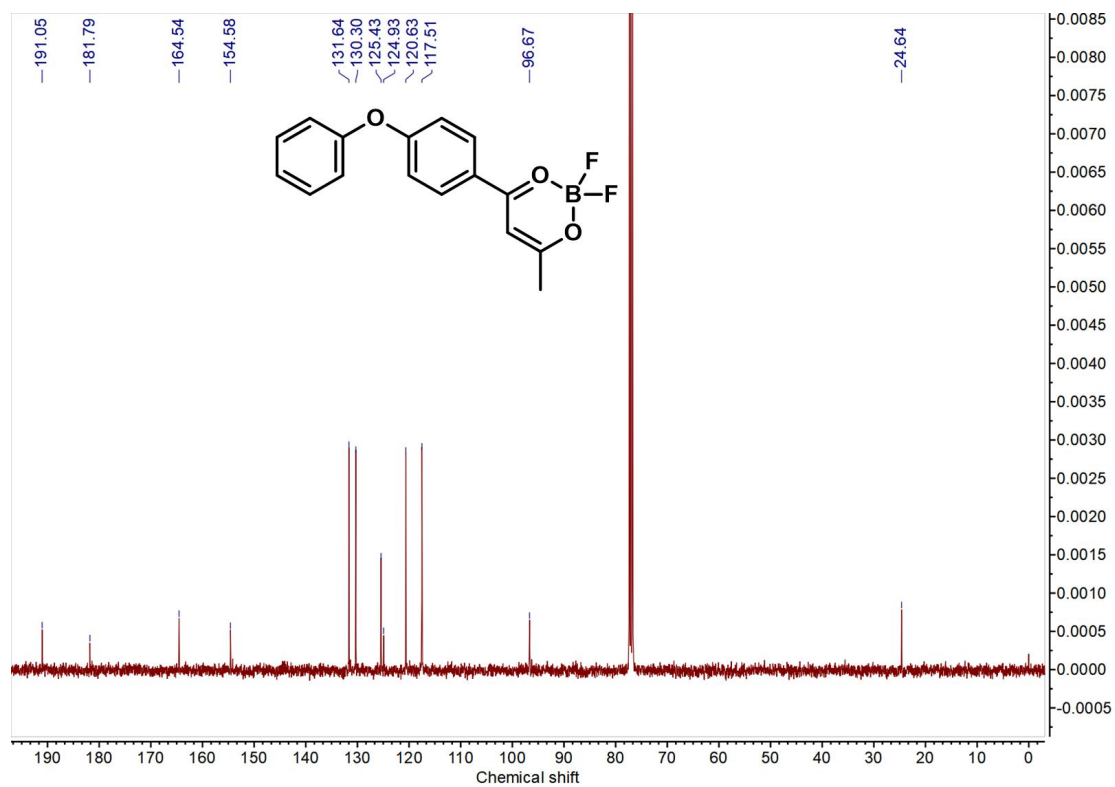

Fig. S14. <sup>13</sup>C NMR spectra of DPEBF<sub>2</sub>.

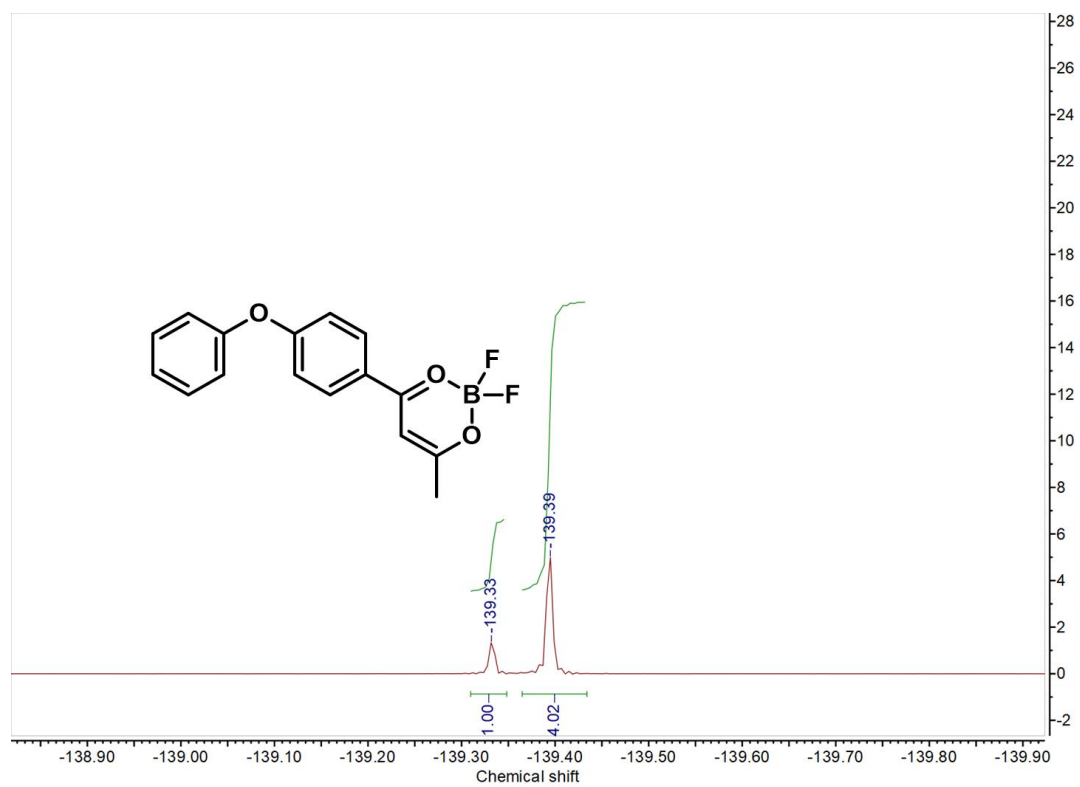

**Fig. S15.** <sup>19</sup>F NMR spectra of DPEBF<sub>2</sub>.

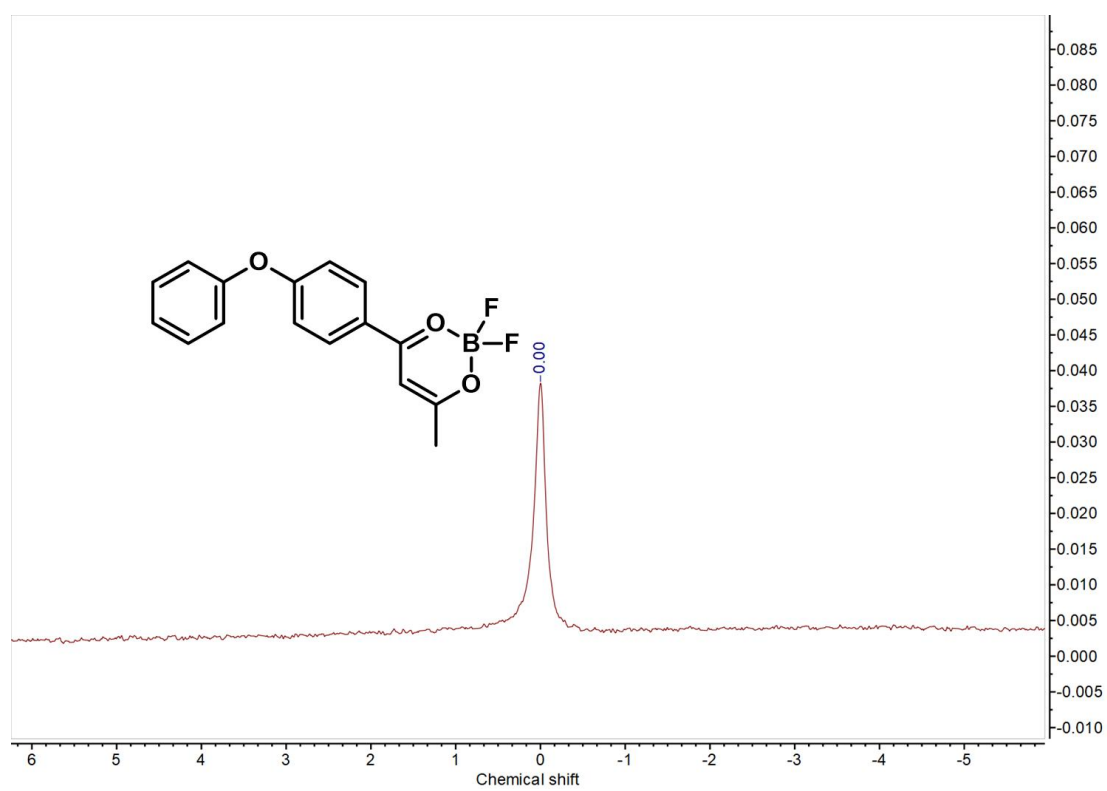

**Fig. S16.** <sup>11</sup>B NMR spectra of DPEBF<sub>2</sub>.

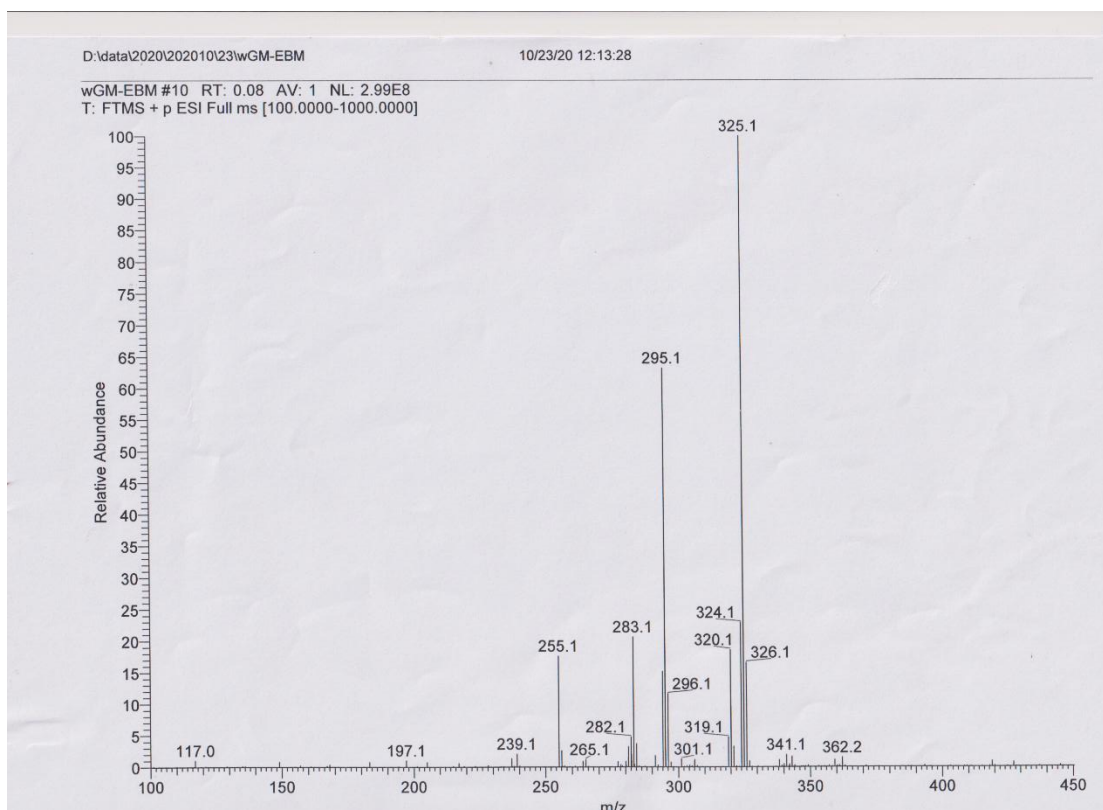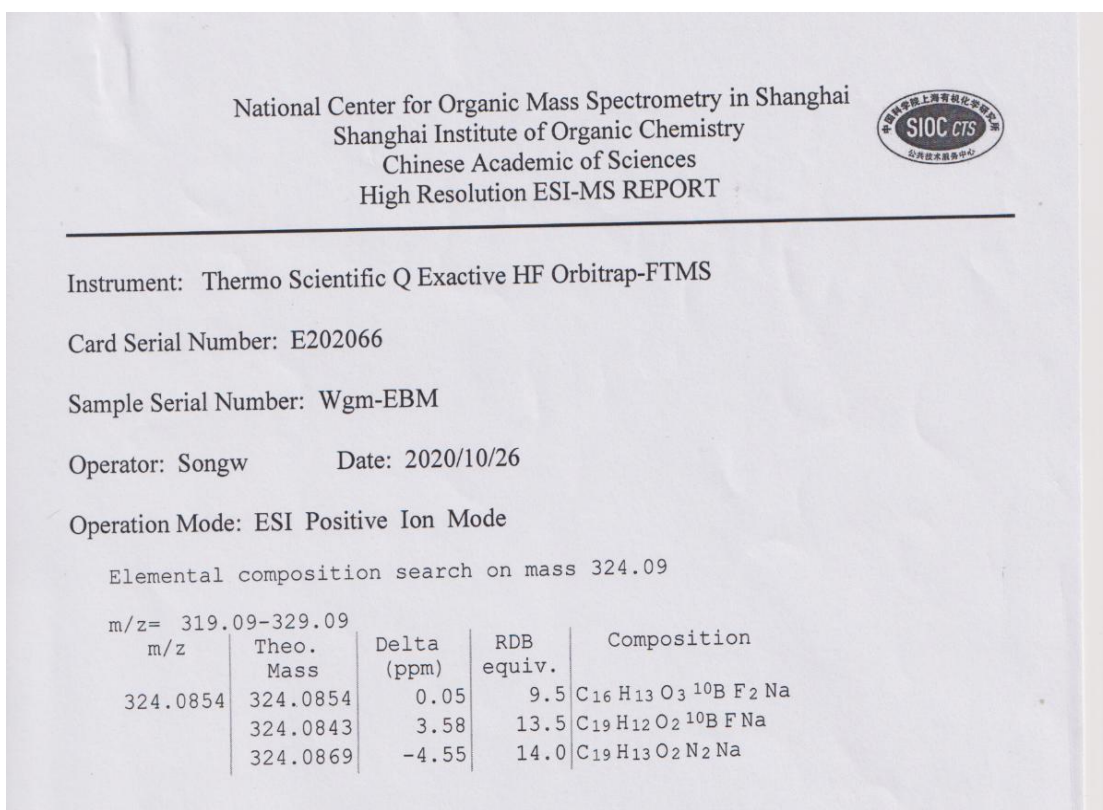

Fig. S17. LRMS and HRMS spectra of DPEBF<sub>2</sub>.

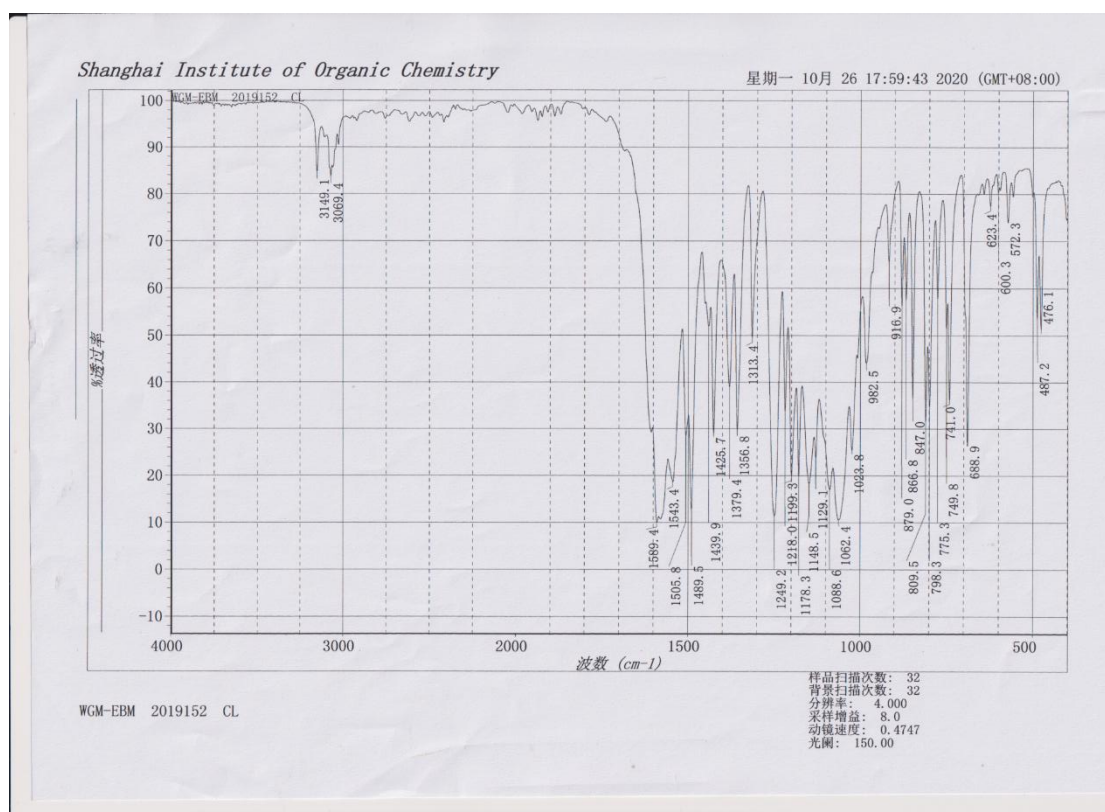

Fig. S18. FT-IR spectra of DPEBF<sub>2</sub>.

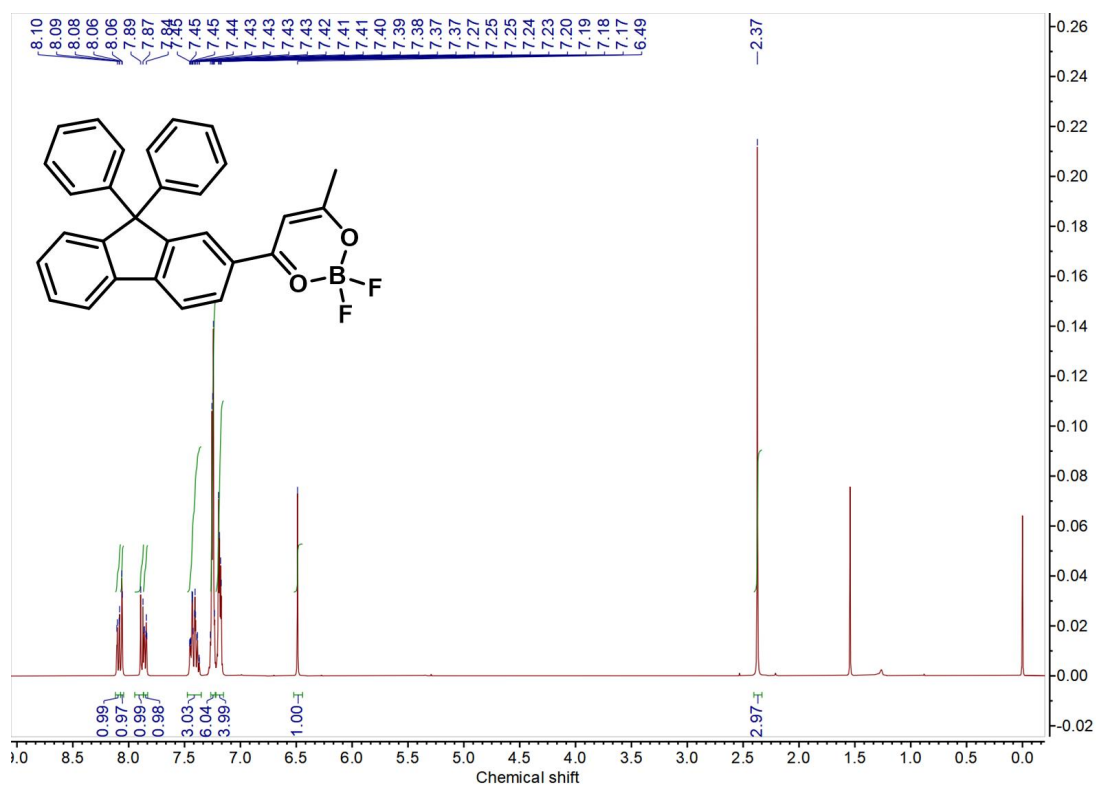

Fig. S19. <sup>1</sup>H NMR spectra of DPFBF<sub>2</sub>.

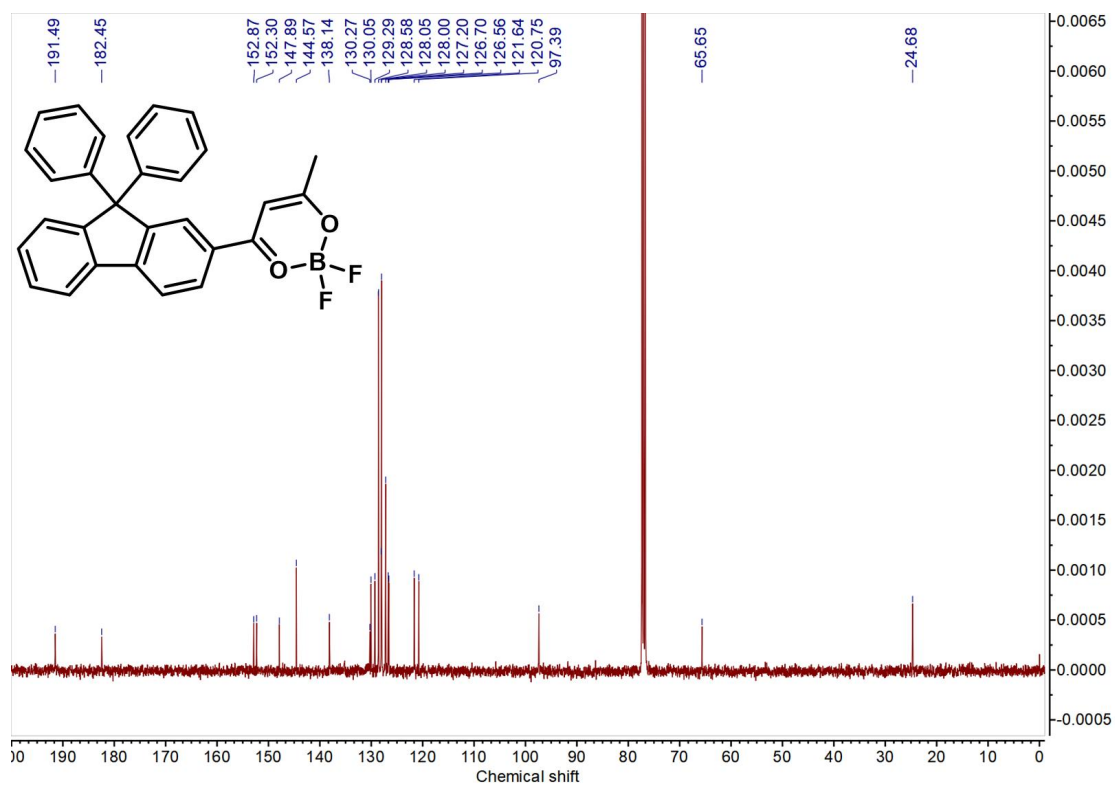

**Fig. S20.** <sup>13</sup>C NMR spectra of DPFBF<sub>2</sub>.

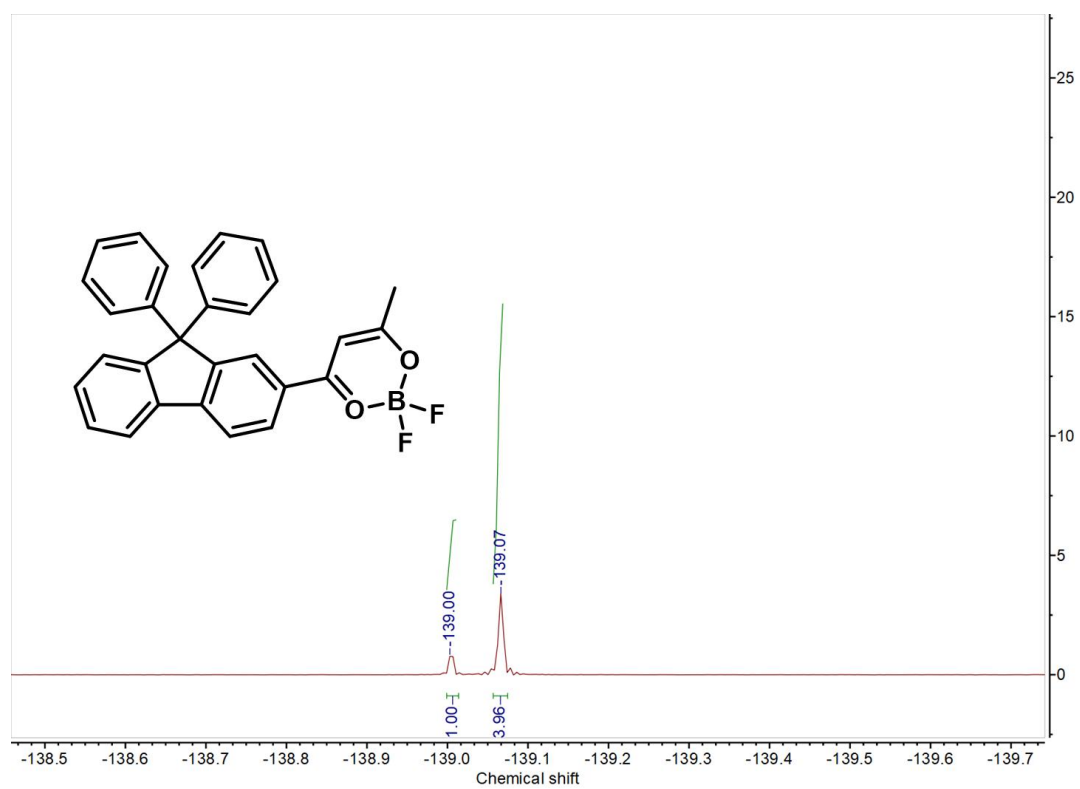

**Fig. S21.** <sup>19</sup>F NMR spectra of DPFBF<sub>2</sub>.



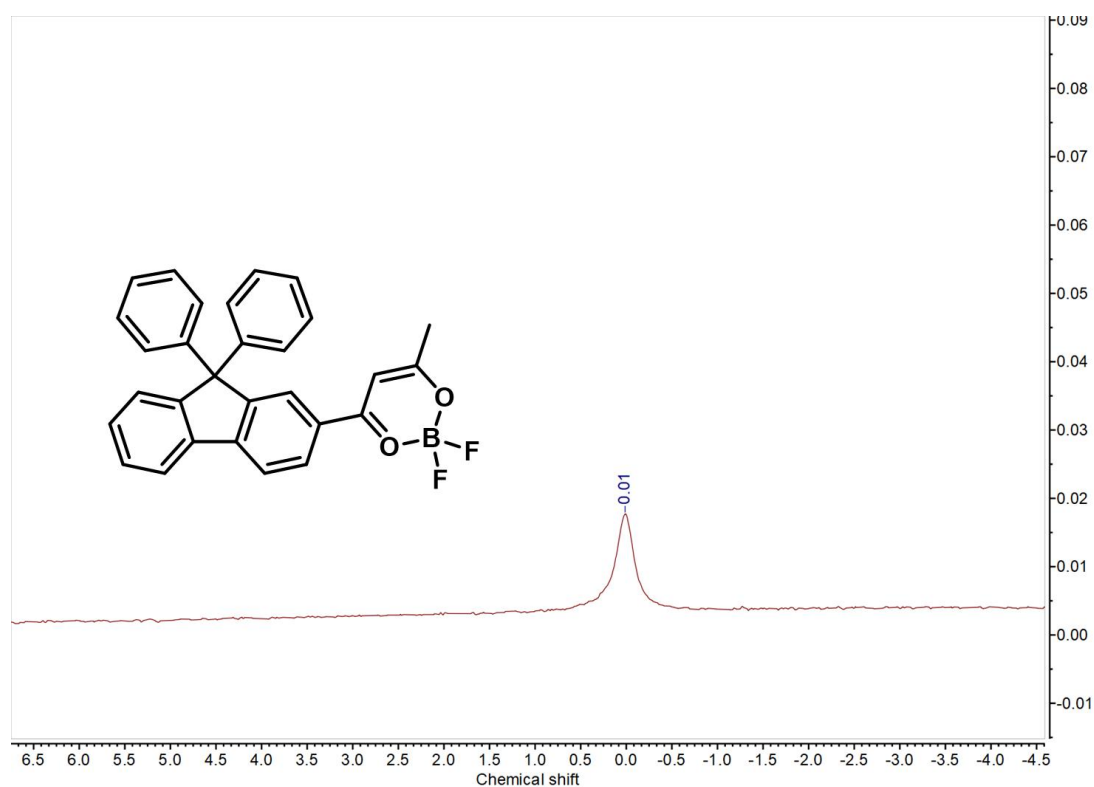

Fig. S22.  $^{11}\text{B}$  NMR spectra of DPFBF<sub>2</sub>.

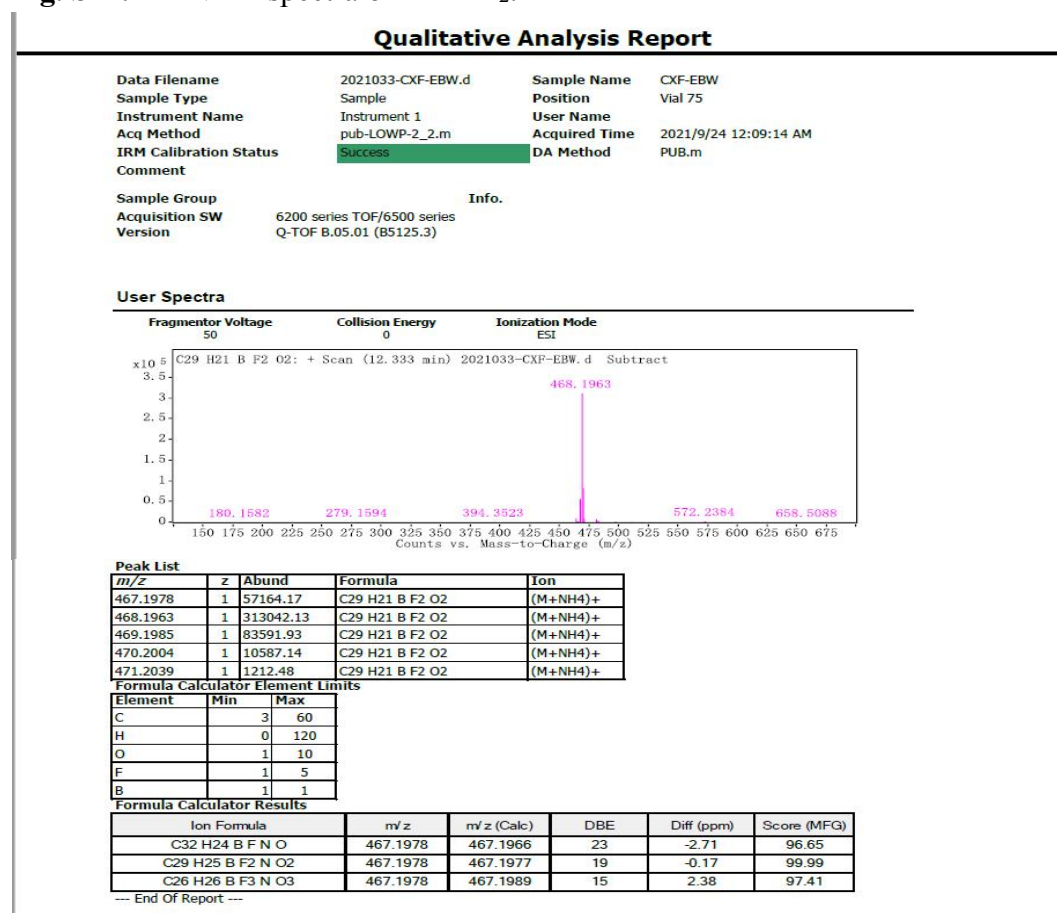

Fig. S23. MS spectra of DPFBF<sub>2</sub>.

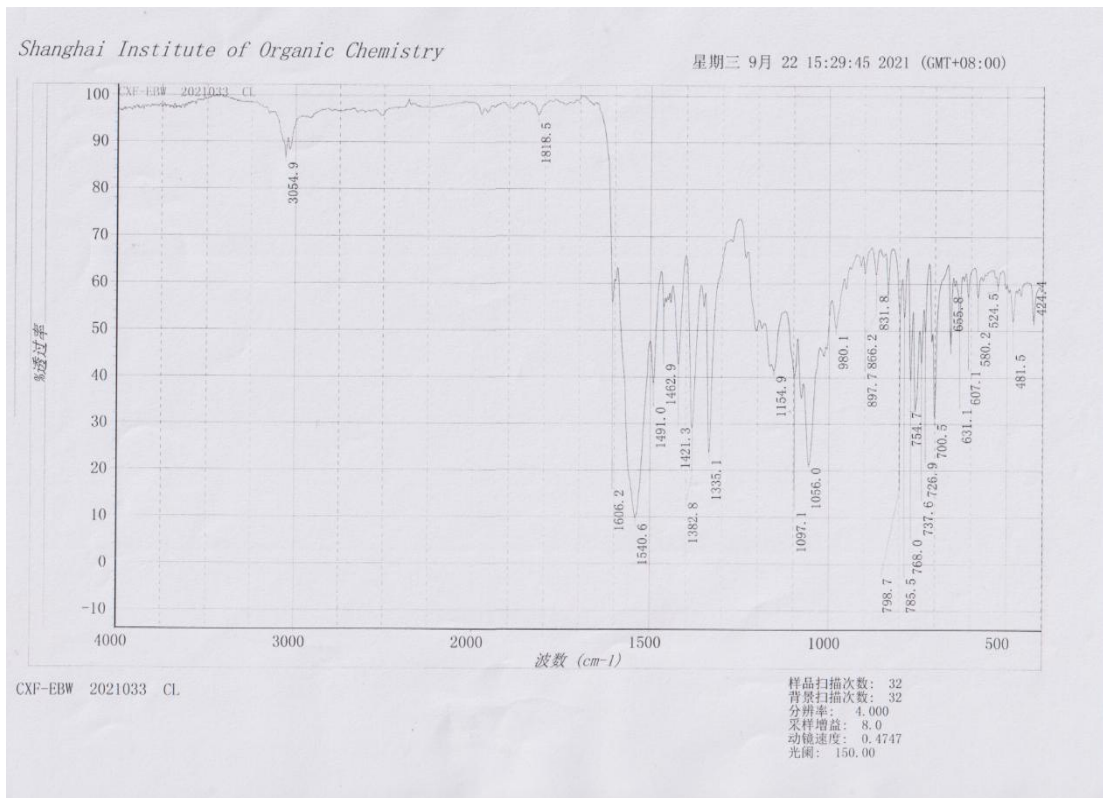

Fig. S24. FT-IR spectra of DPFBF<sub>2</sub>.

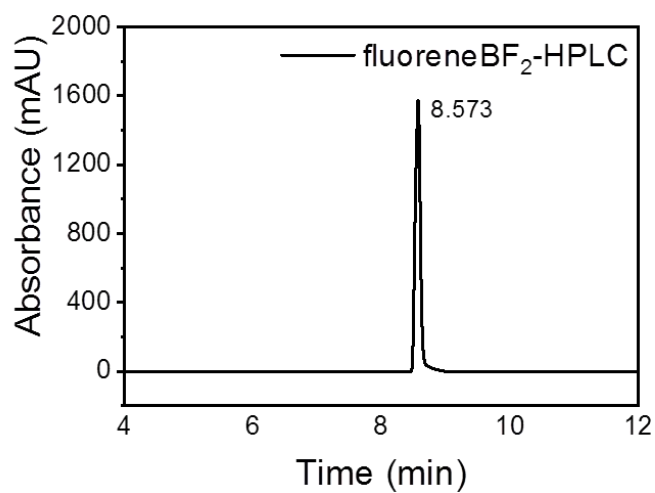

Fig. S25. HPLC spectrum of DPEBF<sub>2</sub>. UV absorption was monitored at 376 nm.

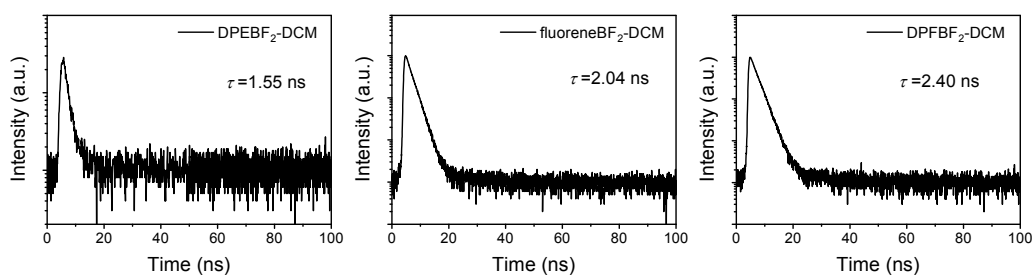

**Fig. S26.** The fluorescence decay profiles of BF<sub>2</sub>bdk in dichloromethane.

**Table S1.** Photophysical data of BF<sub>2</sub>bdk compounds at room temperature.

| Entry                                 | $\lambda_{\text{abs}}/\text{nm}$ ( $\epsilon \times 10^4/\text{M}^{-1}\text{cm}^{-1}$ ) | $\lambda_{\text{em}}/\text{nm}$ | $\tau/\text{ns}$ |
|---------------------------------------|-----------------------------------------------------------------------------------------|---------------------------------|------------------|
| DPEBF <sub>2</sub> in dichloromethane | 358 (3.05)                                                                              | 435                             | 1.55             |
| DPEBF <sub>2</sub> in ethyl acetate   | 346 (3.09)                                                                              | 395                             | 1.51             |
| DPEBF <sub>2</sub> in acetone         | 349 (3.25)                                                                              | 392                             | 2.13             |
| DPEBF <sub>2</sub> in tetrahydrofuran | 347 (3.21)                                                                              | 396                             | 1.62             |
| DPFBF <sub>2</sub> in dichloromethane | 384 (2.16)                                                                              | 440                             | 2.40             |
| DPFBF <sub>2</sub> in ethyl acetate   | 382 (1.27)                                                                              | 424                             | 2.05             |
| DPFBF <sub>2</sub> in acetone         | 382 (4.55)                                                                              | 438                             | 2.52             |
| DPFBF <sub>2</sub> in tetrahydrofuran | 384 (2.78)                                                                              | 428                             | 1.78             |

**Table S2.** Photophysical data of BF<sub>2</sub>bdk-TPO-0.01% and BF<sub>2</sub>bdk-TPO-0.5% powders at room temperature.

| Entry                              | $\lambda_{\text{F}}/\text{nm}$ | $\lambda_{\text{P}}/\text{nm}$ |
|------------------------------------|--------------------------------|--------------------------------|
| DPEBF <sub>2</sub> -TPO-0.5%       | 412                            | 486                            |
| DPEBF <sub>2</sub> -TPO-0.01%      | 410                            | 485                            |
| fluoreneBF <sub>2</sub> -TPO-0.5%  | 440                            | 528                            |
| fluoreneBF <sub>2</sub> -TPO-0.01% | 435                            | 531                            |
| DPFBF <sub>2</sub> -TPO-0.5%       | 463                            | 531                            |
| DPFBF <sub>2</sub> -TPO-0.01%      | 440                            | 530                            |
| SpiroBF <sub>2</sub> -TPO-0.5%     | 450                            | 530                            |
| SpiroBF <sub>2</sub> -TPO-0.01%    | 445                            | 529                            |

**Table S3.** Comparison of the S<sub>1</sub> and T<sub>1</sub> energy levels between TD-DFT results and experimental results.

| Entry                   | BF <sub>2</sub> bdk<br>DT-DFT |                    | BF <sub>2</sub> bdk-0.5%-TPO<br>melt-cast samples |                    | BF <sub>2</sub> bdk-0.5%-TPO<br>powders |                    | BF <sub>2</sub> bdk-0.01%-TPO<br>powders |                    |
|-------------------------|-------------------------------|--------------------|---------------------------------------------------|--------------------|-----------------------------------------|--------------------|------------------------------------------|--------------------|
|                         | S <sub>1</sub> /eV            | T <sub>1</sub> /eV | S <sub>1</sub> /eV                                | T <sub>1</sub> /eV | S <sub>1</sub> /eV                      | T <sub>1</sub> /eV | S <sub>1</sub> /eV                       | T <sub>1</sub> /eV |
| DPEBF <sub>2</sub>      | 4.01                          | 2.83               | 2.99                                              | 2.55               | 3.00                                    | 2.55               | 3.02                                     | 2.56               |
| FluoreneBF <sub>2</sub> | 3.40                          | 2.45               | 2.79                                              | 2.36               | 2.82                                    | 2.35               | 2.85                                     | 2.33               |
| DPFBF <sub>2</sub>      | 3.31                          | 2.65               | 2.80                                              | 2.37               | 2.68                                    | 2.34               | 2.82                                     | 2.34               |
| SpiroBF <sub>2</sub>    | 2.91                          | 2.46               | 2.76                                              | 2.36               | 2.76                                    | 2.34               | 2.78                                     | 2.34               |

**Table S4.** Crystal data and structure refinement for d8v20637 (DPEBF<sub>2</sub>).

|                                 |                                                                 |          |
|---------------------------------|-----------------------------------------------------------------|----------|
| Identification code             | d8v20637                                                        |          |
| Empirical formula               | C <sub>16</sub> H <sub>13</sub> B F <sub>2</sub> O <sub>3</sub> |          |
| Formula weight                  | 302.07                                                          |          |
| Temperature                     | 293(2) K                                                        |          |
| Wavelength                      | 0.71073 Å                                                       |          |
| Crystal system                  | Orthorhombic                                                    |          |
| Space group                     | P n m a                                                         |          |
| Unit cell dimensions            | a = 28.975(2) Å                                                 | α = 90°. |
|                                 | b = 7.2581(5) Å                                                 | β = 90°. |
|                                 | c = 6.7960(5) Å                                                 | γ = 90°. |
| Volume                          | 1429.22(18) Å <sup>3</sup>                                      |          |
| Z                               | 4                                                               |          |
| Density (calculated)            | 1.404 Mg/m <sup>3</sup>                                         |          |
| Absorption coefficient          | 0.112 mm <sup>-1</sup>                                          |          |
| F(000)                          | 624                                                             |          |
| Crystal size                    | 0.200 x 0.140 x 0.110 mm <sup>3</sup>                           |          |
| Theta range for data collection | 3.139 to 25.995°.                                               |          |
| Index ranges                    | -35 ≤ h ≤ 27, -8 ≤ k ≤ 8, -8 ≤ l ≤ 8                            |          |
| Reflections collected           | 6622                                                            |          |
| Independent reflections         | 1505 [R(int) = 0.0686]                                          |          |
| Completeness to theta = 25.242° | 98.9 %                                                          |          |

|                                   |                                             |
|-----------------------------------|---------------------------------------------|
| Absorption correction             | Semi-empirical from equivalents             |
| Max. and min. transmission        | 0.7456 and 0.4799                           |
| Refinement method                 | Full-matrix least-squares on F <sup>2</sup> |
| Data / restraints / parameters    | 1505 / 0 / 126                              |
| Goodness-of-fit on F <sup>2</sup> | 1.034                                       |
| Final R indices [I>2sigma(I)]     | R1 = 0.0452, wR2 = 0.1168                   |
| R indices (all data)              | R1 = 0.0573, wR2 = 0.1296                   |
| Extinction coefficient            | 0.053(12)                                   |
| Largest diff. peak and hole       | 0.198 and -0.181 e.Å <sup>-3</sup>          |

**Table S5.** Atomic coordinates ( x 10<sup>4</sup>) and equivalent isotropic displacement parameters (Å<sup>2</sup> x 10<sup>3</sup>) for d8v20637 (DPEBF<sub>2</sub>). U(eq) is defined as one third of the trace of the orthogonalized U<sup>ij</sup> tensor.

|       | x       | y       | z        | U(eq) |
|-------|---------|---------|----------|-------|
| F(1)  | 4170(1) | 5954(1) | 9911(1)  | 69(1) |
| O(1)  | 3856(1) | 7500    | 7237(2)  | 58(1) |
| O(2)  | 4685(1) | 7500    | 7896(2)  | 61(1) |
| O(3)  | 6646(1) | 7500    | 4142(3)  | 90(1) |
| C(1)  | 3548(1) | 7500    | 4042(4)  | 65(1) |
| C(2)  | 3954(1) | 7500    | 5378(3)  | 47(1) |
| C(3)  | 4399(1) | 7500    | 4715(3)  | 50(1) |
| C(4)  | 4762(1) | 7500    | 6030(3)  | 42(1) |
| C(5)  | 5250(1) | 7500    | 5459(3)  | 42(1) |
| C(6)  | 5389(1) | 7500    | 3500(3)  | 49(1) |
| C(7)  | 5852(1) | 7500    | 2999(3)  | 51(1) |
| C(8)  | 6177(1) | 7500    | 4476(3)  | 55(1) |
| C(9)  | 6048(1) | 7500    | 6428(4)  | 67(1) |
| C(10) | 5588(1) | 7500    | 6911(3)  | 56(1) |
| C(11) | 6818(1) | 7500    | 2227(4)  | 62(1) |
| C(12) | 6920(1) | 5865(3) | 1331(3)  | 73(1) |
| C(13) | 7131(1) | 5873(3) | -481(3)  | 77(1) |
| C(14) | 7239(1) | 7500    | -1379(4) | 74(1) |
| B(1)  | 4218(1) | 7500    | 8786(4)  | 51(1) |

**Table S6.** Bond lengths [Å] and angles [°] for d8v20637 (DPEBF<sub>2</sub>).

---

|                |            |
|----------------|------------|
| F(1)-B(1)      | 1.3649(16) |
| O(1)-C(2)      | 1.295(3)   |
| O(1)-B(1)      | 1.487(3)   |
| O(2)-C(4)      | 1.288(2)   |
| O(2)-B(1)      | 1.480(3)   |
| O(3)-C(8)      | 1.378(3)   |
| O(3)-C(11)     | 1.393(3)   |
| C(1)-C(2)      | 1.487(3)   |
| C(1)-H(1A)     | 0.9600     |
| C(1)-H(1B)     | 0.9600     |
| C(1)-H(1C)     | 0.9600     |
| C(2)-C(3)      | 1.366(3)   |
| C(3)-C(4)      | 1.381(3)   |
| C(3)-H(3)      | 0.9300     |
| C(4)-C(5)      | 1.464(3)   |
| C(5)-C(6)      | 1.391(3)   |
| C(5)-C(10)     | 1.391(3)   |
| C(6)-C(7)      | 1.384(3)   |
| C(6)-H(6)      | 0.9300     |
| C(7)-C(8)      | 1.377(3)   |
| C(7)-H(7)      | 0.9300     |
| C(8)-C(9)      | 1.378(3)   |
| C(9)-C(10)     | 1.374(3)   |
| C(9)-H(9)      | 0.9300     |
| C(10)-H(10)    | 0.9300     |
| C(11)-C(12)#1  | 1.366(2)   |
| C(11)-C(12)    | 1.366(2)   |
| C(12)-C(13)    | 1.375(3)   |
| C(12)-H(12)    | 0.9300     |
| C(13)-C(14)    | 1.366(3)   |
| C(13)-H(13)    | 0.9300     |
| C(14)-C(13)#1  | 1.366(3)   |
| C(14)-H(14)    | 0.9300     |
| B(1)-F(1)#1    | 1.3648(16) |
| C(2)-O(1)-B(1) | 122.37(18) |
| C(4)-O(2)-B(1) | 124.19(18) |

|                     |            |
|---------------------|------------|
| C(8)-O(3)-C(11)     | 120.32(18) |
| C(2)-C(1)-H(1A)     | 109.5      |
| C(2)-C(1)-H(1B)     | 109.5      |
| H(1A)-C(1)-H(1B)    | 109.5      |
| C(2)-C(1)-H(1C)     | 109.5      |
| H(1A)-C(1)-H(1C)    | 109.5      |
| H(1B)-C(1)-H(1C)    | 109.5      |
| O(1)-C(2)-C(3)      | 122.0(2)   |
| O(1)-C(2)-C(1)      | 114.9(2)   |
| C(3)-C(2)-C(1)      | 123.1(2)   |
| C(2)-C(3)-C(4)      | 120.4(2)   |
| C(2)-C(3)-H(3)      | 119.8      |
| C(4)-C(3)-H(3)      | 119.8      |
| O(2)-C(4)-C(3)      | 120.22(19) |
| O(2)-C(4)-C(5)      | 115.47(18) |
| C(3)-C(4)-C(5)      | 124.31(19) |
| C(6)-C(5)-C(10)     | 118.3(2)   |
| C(6)-C(5)-C(4)      | 122.25(19) |
| C(10)-C(5)-C(4)     | 119.43(19) |
| C(7)-C(6)-C(5)      | 121.1(2)   |
| C(7)-C(6)-H(6)      | 119.4      |
| C(5)-C(6)-H(6)      | 119.4      |
| C(8)-C(7)-C(6)      | 118.9(2)   |
| C(8)-C(7)-H(7)      | 120.5      |
| C(6)-C(7)-H(7)      | 120.5      |
| C(7)-C(8)-O(3)      | 123.7(2)   |
| C(7)-C(8)-C(9)      | 121.1(2)   |
| O(3)-C(8)-C(9)      | 115.2(2)   |
| C(10)-C(9)-C(8)     | 119.5(2)   |
| C(10)-C(9)-H(9)     | 120.2      |
| C(8)-C(9)-H(9)      | 120.2      |
| C(9)-C(10)-C(5)     | 121.0(2)   |
| C(9)-C(10)-H(10)    | 119.5      |
| C(5)-C(10)-H(10)    | 119.5      |
| C(12)#1-C(11)-C(12) | 120.6(2)   |
| C(12)#1-C(11)-O(3)  | 119.56(12) |
| C(12)-C(11)-O(3)    | 119.56(12) |
| C(11)-C(12)-C(13)   | 119.4(2)   |

|                     |            |
|---------------------|------------|
| C(11)-C(12)-H(12)   | 120.3      |
| C(13)-C(12)-H(12)   | 120.3      |
| C(14)-C(13)-C(12)   | 120.4(2)   |
| C(14)-C(13)-H(13)   | 119.8      |
| C(12)-C(13)-H(13)   | 119.8      |
| C(13)#1-C(14)-C(13) | 119.7(3)   |
| C(13)#1-C(14)-H(14) | 120.2      |
| C(13)-C(14)-H(14)   | 120.2      |
| F(1)#1-B(1)-F(1)    | 110.56(18) |
| F(1)#1-B(1)-O(2)    | 108.75(14) |
| F(1)-B(1)-O(2)      | 108.74(14) |
| F(1)#1-B(1)-O(1)    | 108.97(14) |
| F(1)-B(1)-O(1)      | 108.98(14) |
| O(2)-B(1)-O(1)      | 110.85(17) |

---

Symmetry transformations used to generate equivalent atoms:

#1 x,-y+3/2,z

**Table S7.** Crystal data and structure refinement for mo\_d8v20682\_0m (fluoreneBF<sub>2</sub>).

|                        |                                                                 |                  |
|------------------------|-----------------------------------------------------------------|------------------|
| Identification code    | mo_d8v20682_0m                                                  |                  |
| Empirical formula      | C <sub>19</sub> H <sub>17</sub> B F <sub>2</sub> O <sub>2</sub> |                  |
| Formula weight         | 326.13                                                          |                  |
| Temperature            | 293(2) K                                                        |                  |
| Wavelength             | 0.71073 Å                                                       |                  |
| Crystal system         | Monoclinic                                                      |                  |
| Space group            | P 21/m                                                          |                  |
| Unit cell dimensions   | a = 8.1515(6) Å                                                 | α = 90°.         |
|                        | b = 7.1248(6) Å                                                 | β = 103.612(2)°. |
|                        | c = 14.2590(11) Å                                               | γ = 90°.         |
| Volume                 | 804.87(11) Å <sup>3</sup>                                       |                  |
| Z                      | 2                                                               |                  |
| Density (calculated)   | 1.346 Mg/m <sup>3</sup>                                         |                  |
| Absorption coefficient | 0.100 mm <sup>-1</sup>                                          |                  |
| F(000)                 | 340                                                             |                  |
| Crystal size           | 0.200 x 0.150 x 0.110 mm <sup>3</sup>                           |                  |



|                                   |                                             |
|-----------------------------------|---------------------------------------------|
| Theta range for data collection   | 2.644 to 25.996°.                           |
| Index ranges                      | -10<=h<=10, -8<=k<=8, -15<=l<=17            |
| Reflections collected             | 12022                                       |
| Independent reflections           | 1695 [R(int) = 0.0628]                      |
| Completeness to theta = 25.242°   | 98.9 %                                      |
| Absorption correction             | Semi-empirical from equivalents             |
| Max. and min. transmission        | 0.7456 and 0.5089                           |
| Refinement method                 | Full-matrix least-squares on F <sup>2</sup> |
| Data / restraints / parameters    | 1695 / 0 / 142                              |
| Goodness-of-fit on F <sup>2</sup> | 1.054                                       |
| Final R indices [I>2sigma(I)]     | R1 = 0.0487, wR2 = 0.1253                   |
| R indices (all data)              | R1 = 0.0568, wR2 = 0.1334                   |
| Extinction coefficient            | 0.11(3)                                     |
| Largest diff. peak and hole       | 0.302 and -0.273 e.Å <sup>-3</sup>          |

**Table S8.** Atomic coordinates (x 10<sup>4</sup>) and equivalent isotropic displacement parameters (Å<sup>2</sup> x 10<sup>3</sup>) for mo\_d8v20682\_0m (fluoreneBF<sub>2</sub>). U(eq) is defined as one third of the trace of the orthogonalized U<sup>ij</sup> tensor.

|      | x       | y       | z       | U(eq)  |
|------|---------|---------|---------|--------|
| F(1) | 2122(2) | 5927(3) | 8594(1) | 128(1) |
| O(1) | 3071(2) | 7500    | 7424(1) | 59(1)  |
| O(2) | 4590(3) | 7500    | 9119(1) | 77(1)  |
| C(1) | 1236(2) | 7500    | 3646(1) | 38(1)  |
| C(2) | 2083(3) | 7500    | 2803(1) | 41(1)  |
| C(3) | 1337(3) | 7500    | 1824(2) | 57(1)  |
| C(4) | 2368(4) | 7500    | 1175(2) | 64(1)  |
| C(5) | 4099(4) | 7500    | 1491(2) | 60(1)  |
| C(6) | 4863(3) | 7500    | 2466(2) | 49(1)  |
| C(7) | 3838(3) | 7500    | 3118(1) | 38(1)  |
| C(8) | 4267(2) | 7500    | 4175(1) | 34(1)  |
| C(9) | 5823(3) | 7500    | 4827(2) | 42(1)  |

|       |         |         |         |       |
|-------|---------|---------|---------|-------|
| C(10) | 5876(3) | 7500    | 5800(2) | 43(1) |
| C(11) | 4406(3) | 7500    | 6138(1) | 36(1) |
| C(12) | 2833(2) | 7500    | 5475(1) | 35(1) |
| C(13) | 2772(2) | 7500    | 4496(1) | 33(1) |
| C(14) | 140(2)  | 5749(2) | 3639(1) | 51(1) |
| C(15) | 4501(3) | 7500    | 7182(1) | 40(1) |
| C(16) | 5990(3) | 7500    | 7881(2) | 56(1) |
| C(17) | 5978(4) | 7500    | 8842(2) | 56(1) |
| C(18) | 7556(4) | 7500    | 9626(2) | 82(1) |
| B(1)  | 2925(4) | 7500    | 8440(2) | 63(1) |

---

**Table S9.** Bond lengths [Å] and angles [°] for mo\_d8v20682\_0m (fluoreneBF<sub>2</sub>).

|              |            |
|--------------|------------|
| F(1)-B(1)    | 1.342(2)   |
| O(1)-C(15)   | 1.291(3)   |
| O(1)-B(1)    | 1.483(3)   |
| O(2)-C(17)   | 1.283(3)   |
| O(2)-B(1)    | 1.470(4)   |
| C(1)-C(2)    | 1.521(3)   |
| C(1)-C(13)   | 1.524(3)   |
| C(1)-C(14)   | 1.5333(19) |
| C(1)-C(14)#1 | 1.5333(19) |
| C(2)-C(3)    | 1.384(3)   |
| C(2)-C(7)    | 1.395(3)   |
| C(3)-C(4)    | 1.389(3)   |
| C(3)-H(3)    | 0.9300     |
| C(4)-C(5)    | 1.377(4)   |
| C(4)-H(4)    | 0.9300     |
| C(5)-C(6)    | 1.383(3)   |
| C(5)-H(5)    | 0.9300     |
| C(6)-C(7)    | 1.390(3)   |
| C(6)-H(6)    | 0.9300     |
| C(7)-C(8)    | 1.464(3)   |
| C(8)-C(9)    | 1.385(3)   |
| C(8)-C(13)   | 1.399(3)   |
| C(9)-C(10)   | 1.378(3)   |

|                    |            |
|--------------------|------------|
| C(9)-H(9)          | 0.9300     |
| C(10)-C(11)        | 1.392(3)   |
| C(10)-H(10)        | 0.9300     |
| C(11)-C(12)        | 1.403(3)   |
| C(11)-C(15)        | 1.472(3)   |
| C(12)-C(13)        | 1.385(3)   |
| C(12)-H(12)        | 0.9300     |
| C(14)-H(14A)       | 0.9600     |
| C(14)-H(14B)       | 0.9600     |
| C(14)-H(14C)       | 0.9600     |
| C(15)-C(16)        | 1.378(3)   |
| C(16)-C(17)        | 1.372(3)   |
| C(16)-H(16)        | 0.9300     |
| C(17)-C(18)        | 1.492(3)   |
| C(18)-H(18A)       | 0.9600     |
| C(18)-H(18B)       | 0.9600     |
| C(18)-H(18C)       | 0.9600     |
| B(1)-F(1)#1        | 1.342(2)   |
| C(15)-O(1)-B(1)    | 123.16(19) |
| C(17)-O(2)-B(1)    | 122.83(19) |
| C(2)-C(1)-C(13)    | 100.85(15) |
| C(2)-C(1)-C(14)    | 111.52(10) |
| C(13)-C(1)-C(14)   | 111.96(10) |
| C(2)-C(1)-C(14)#1  | 111.52(10) |
| C(13)-C(1)-C(14)#1 | 111.96(10) |
| C(14)-C(1)-C(14)#1 | 108.90(17) |
| C(3)-C(2)-C(7)     | 119.96(19) |
| C(3)-C(2)-C(1)     | 128.55(19) |
| C(7)-C(2)-C(1)     | 111.48(16) |
| C(2)-C(3)-C(4)     | 118.7(2)   |
| C(2)-C(3)-H(3)     | 120.6      |
| C(4)-C(3)-H(3)     | 120.6      |
| C(5)-C(4)-C(3)     | 121.1(2)   |
| C(5)-C(4)-H(4)     | 119.5      |
| C(3)-C(4)-H(4)     | 119.5      |
| C(4)-C(5)-C(6)     | 120.9(2)   |
| C(4)-C(5)-H(5)     | 119.6      |
| C(6)-C(5)-H(5)     | 119.6      |

|                     |            |
|---------------------|------------|
| C(5)-C(6)-C(7)      | 118.3(2)   |
| C(5)-C(6)-H(6)      | 120.9      |
| C(7)-C(6)-H(6)      | 120.9      |
| C(6)-C(7)-C(2)      | 121.10(19) |
| C(6)-C(7)-C(8)      | 130.8(2)   |
| C(2)-C(7)-C(8)      | 108.12(16) |
| C(9)-C(8)-C(13)     | 120.64(17) |
| C(9)-C(8)-C(7)      | 130.60(18) |
| C(13)-C(8)-C(7)     | 108.76(17) |
| C(10)-C(9)-C(8)     | 118.89(19) |
| C(10)-C(9)-H(9)     | 120.6      |
| C(8)-C(9)-H(9)      | 120.6      |
| C(9)-C(10)-C(11)    | 121.52(19) |
| C(9)-C(10)-H(10)    | 119.2      |
| C(11)-C(10)-H(10)   | 119.2      |
| C(10)-C(11)-C(12)   | 119.44(18) |
| C(10)-C(11)-C(15)   | 120.33(18) |
| C(12)-C(11)-C(15)   | 120.23(18) |
| C(13)-C(12)-C(11)   | 119.29(18) |
| C(13)-C(12)-H(12)   | 120.4      |
| C(11)-C(12)-H(12)   | 120.4      |
| C(12)-C(13)-C(8)    | 120.21(17) |
| C(12)-C(13)-C(1)    | 129.00(17) |
| C(8)-C(13)-C(1)     | 110.78(16) |
| C(1)-C(14)-H(14A)   | 109.5      |
| C(1)-C(14)-H(14B)   | 109.5      |
| H(14A)-C(14)-H(14B) | 109.5      |
| C(1)-C(14)-H(14C)   | 109.5      |
| H(14A)-C(14)-H(14C) | 109.5      |
| H(14B)-C(14)-H(14C) | 109.5      |
| O(1)-C(15)-C(16)    | 120.22(19) |
| O(1)-C(15)-C(11)    | 115.75(18) |
| C(16)-C(15)-C(11)   | 124.0(2)   |
| C(17)-C(16)-C(15)   | 120.7(2)   |
| C(17)-C(16)-H(16)   | 119.6      |
| C(15)-C(16)-H(16)   | 119.6      |
| O(2)-C(17)-C(16)    | 121.4(2)   |
| O(2)-C(17)-C(18)    | 115.9(2)   |

|                     |            |
|---------------------|------------|
| C(16)-C(17)-C(18)   | 122.7(3)   |
| C(17)-C(18)-H(18A)  | 109.5      |
| C(17)-C(18)-H(18B)  | 109.5      |
| H(18A)-C(18)-H(18B) | 109.5      |
| C(17)-C(18)-H(18C)  | 109.5      |
| H(18A)-C(18)-H(18C) | 109.5      |
| H(18B)-C(18)-H(18C) | 109.5      |
| F(1)#1-B(1)-F(1)    | 113.4(3)   |
| F(1)#1-B(1)-O(2)    | 107.65(16) |
| F(1)-B(1)-O(2)      | 107.65(16) |
| F(1)#1-B(1)-O(1)    | 108.29(14) |
| F(1)-B(1)-O(1)      | 108.29(14) |
| O(2)-B(1)-O(1)      | 111.7(2)   |

---

Symmetry transformations used to generate equivalent atoms:

#1 x,-y+3/2,z

**Table S10.** Crystal data and structure refinement for mo\_d8v20638\_0m (SpiroBF<sub>2</sub>).

|                        |                                                                 |                 |
|------------------------|-----------------------------------------------------------------|-----------------|
| Identification code    | mo_d8v20638_0m                                                  |                 |
| Empirical formula      | C <sub>29</sub> H <sub>19</sub> B F <sub>2</sub> O <sub>2</sub> |                 |
| Formula weight         | 448.25                                                          |                 |
| Temperature            | 293.4 K                                                         |                 |
| Wavelength             | 0.71073 Å                                                       |                 |
| Crystal system         | Monoclinic                                                      |                 |
| Space group            | P 1 21/n 1                                                      |                 |
| Unit cell dimensions   | a = 10.0422(5) Å                                                | α = 90°.        |
|                        | b = 18.3455(7) Å                                                | β = 99.116(2)°. |
|                        | c = 14.3713(7) Å                                                | γ = 90°.        |
| Volume                 | 2614.2(2) Å <sup>3</sup>                                        |                 |
| Z                      | 4                                                               |                 |
| Density (calculated)   | 1.139 Mg/m <sup>3</sup>                                         |                 |
| Absorption coefficient | 0.080 mm <sup>-1</sup>                                          |                 |
| F(000)                 | 928                                                             |                 |
| Crystal size           | 0.2 x 0.16 x 0.12 mm <sup>3</sup>                               |                 |

|                                   |                                             |
|-----------------------------------|---------------------------------------------|
| Theta range for data collection   | 2.565 to 27.484°.                           |
| Index ranges                      | -12<=h<=13, -23<=k<=23, -18<=l<=14          |
| Reflections collected             | 14395                                       |
| Independent reflections           | 5917 [R(int) = 0.0432]                      |
| Completeness to theta = 25.242°   | 99.2 %                                      |
| Absorption correction             | Semi-empirical from equivalents             |
| Max. and min. transmission        | 0.7456 and 0.5811                           |
| Refinement method                 | Full-matrix least-squares on F <sup>2</sup> |
| Data / restraints / parameters    | 5917 / 0 / 308                              |
| Goodness-of-fit on F <sup>2</sup> | 1.016                                       |
| Final R indices [I>2sigma(I)]     | R1 = 0.0561, wR2 = 0.1552                   |
| R indices (all data)              | R1 = 0.0958, wR2 = 0.1866                   |
| Extinction coefficient            | n/a                                         |
| Largest diff. peak and hole       | 0.171 and -0.167 e.Å <sup>-3</sup>          |

**Table S11.** Atomic coordinates ( x 10<sup>4</sup>) and equivalent isotropic displacement parameters (Å<sup>2</sup> x 10<sup>3</sup>) for mo\_d8v20638\_0m (SpiroBF<sub>2</sub>). U(eq) is defined as one third of the trace of the orthogonalized U<sup>ij</sup> tensor.

|      | x       | y       | z       | U(eq)  |
|------|---------|---------|---------|--------|
| F(1) | 2481(1) | 5510(1) | 4187(1) | 86(1)  |
| F(2) | 2584(2) | 5184(1) | 2691(1) | 102(1) |
| O(1) | 3471(1) | 4415(1) | 3904(1) | 76(1)  |
| O(2) | 4518(1) | 5584(1) | 3646(1) | 72(1)  |
| C(1) | 4697(3) | 3324(1) | 4181(2) | 80(1)  |
| C(2) | 4641(2) | 4114(1) | 3941(1) | 58(1)  |
| C(3) | 5739(2) | 4506(1) | 3793(2) | 59(1)  |
| C(4) | 5666(2) | 5253(1) | 3676(1) | 50(1)  |
| C(5) | 6829(2) | 5721(1) | 3614(1) | 50(1)  |
| C(6) | 8114(2) | 5428(1) | 3633(2) | 65(1)  |
| C(7) | 9211(2) | 5865(1) | 3567(2) | 69(1)  |
| C(8) | 9023(2) | 6616(1) | 3494(1) | 52(1)  |

|       |          |         |         |        |
|-------|----------|---------|---------|--------|
| C(9)  | 9982(2)  | 7208(1) | 3425(1) | 54(1)  |
| C(10) | 11360(2) | 7194(1) | 3407(2) | 72(1)  |
| C(11) | 12032(2) | 7850(1) | 3364(2) | 80(1)  |
| C(12) | 11351(2) | 8504(1) | 3338(2) | 75(1)  |
| C(13) | 9974(2)  | 8520(1) | 3352(1) | 63(1)  |
| C(14) | 9290(2)  | 7866(1) | 3397(1) | 51(1)  |
| C(15) | 7801(2)  | 7746(1) | 3438(1) | 48(1)  |
| C(16) | 7746(2)  | 6915(1) | 3492(1) | 47(1)  |
| C(17) | 6648(2)  | 6479(1) | 3539(1) | 49(1)  |
| C(18) | 6838(2)  | 8065(1) | 2614(1) | 52(1)  |
| C(19) | 6806(2)  | 7940(1) | 1663(2) | 65(1)  |
| C(20) | 5805(2)  | 8296(1) | 1032(2) | 79(1)  |
| C(21) | 4886(3)  | 8751(1) | 1351(2) | 83(1)  |
| C(22) | 4911(2)  | 8870(1) | 2294(2) | 76(1)  |
| C(23) | 5905(2)  | 8528(1) | 2934(2) | 61(1)  |
| C(24) | 6193(2)  | 8556(1) | 3963(2) | 65(1)  |
| C(25) | 5591(3)  | 8941(1) | 4623(2) | 93(1)  |
| C(26) | 6117(4)  | 8882(2) | 5559(2) | 109(1) |
| C(27) | 7210(4)  | 8449(2) | 5854(2) | 96(1)  |
| C(28) | 7813(3)  | 8060(1) | 5216(2) | 72(1)  |
| C(29) | 7306(2)  | 8117(1) | 4273(1) | 55(1)  |
| B(1)  | 3229(2)  | 5178(1) | 3596(2) | 68(1)  |

**Table S12.** Bond lengths [ $\text{\AA}$ ] and angles [ $^\circ$ ] for mo\_d8v20638\_0m (SpiroBF<sub>2</sub>).

|            |          |
|------------|----------|
| F(1)-B(1)  | 1.363(3) |
| F(2)-B(1)  | 1.359(3) |
| O(1)-C(2)  | 1.291(2) |
| O(1)-B(1)  | 1.477(3) |
| O(2)-C(4)  | 1.297(2) |
| O(2)-B(1)  | 1.485(3) |
| C(1)-H(1A) | 0.9600   |
| C(1)-H(1B) | 0.9600   |
| C(1)-H(1C) | 0.9600   |
| C(1)-C(2)  | 1.490(3) |
| C(2)-C(3)  | 1.360(3) |
| C(3)-H(3)  | 0.9300   |

|             |          |
|-------------|----------|
| C(3)-C(4)   | 1.382(2) |
| C(4)-C(5)   | 1.463(2) |
| C(5)-C(6)   | 1.395(2) |
| C(5)-C(17)  | 1.405(2) |
| C(6)-H(6)   | 0.9300   |
| C(6)-C(7)   | 1.379(3) |
| C(7)-H(7)   | 0.9300   |
| C(7)-C(8)   | 1.393(3) |
| C(8)-C(9)   | 1.465(2) |
| C(8)-C(16)  | 1.394(2) |
| C(9)-C(10)  | 1.389(3) |
| C(9)-C(14)  | 1.391(3) |
| C(10)-H(10) | 0.9300   |
| C(10)-C(11) | 1.385(3) |
| C(11)-H(11) | 0.9300   |
| C(11)-C(12) | 1.378(3) |
| C(12)-H(12) | 0.9300   |
| C(12)-C(13) | 1.387(3) |
| C(13)-H(13) | 0.9300   |
| C(13)-C(14) | 1.390(2) |
| C(14)-C(15) | 1.522(2) |
| C(15)-C(16) | 1.527(2) |
| C(15)-C(18) | 1.522(3) |
| C(15)-C(29) | 1.530(2) |
| C(16)-C(17) | 1.372(2) |
| C(17)-H(17) | 0.9300   |
| C(18)-C(19) | 1.381(3) |
| C(18)-C(23) | 1.395(3) |
| C(19)-H(19) | 0.9300   |
| C(19)-C(20) | 1.405(3) |
| C(20)-H(20) | 0.9300   |
| C(20)-C(21) | 1.376(4) |
| C(21)-H(21) | 0.9300   |
| C(21)-C(22) | 1.368(4) |
| C(22)-H(22) | 0.9300   |
| C(22)-C(23) | 1.395(3) |
| C(23)-C(24) | 1.462(3) |
| C(24)-C(25) | 1.395(3) |



|             |          |
|-------------|----------|
| C(24)-C(29) | 1.393(3) |
| C(25)-H(25) | 0.9300   |
| C(25)-C(26) | 1.369(4) |
| C(26)-H(26) | 0.9300   |
| C(26)-C(27) | 1.366(4) |
| C(27)-H(27) | 0.9300   |
| C(27)-C(28) | 1.376(3) |
| C(28)-H(28) | 0.9300   |
| C(28)-C(29) | 1.374(3) |

|                  |            |
|------------------|------------|
| C(2)-O(1)-B(1)   | 121.51(16) |
| C(4)-O(2)-B(1)   | 122.08(15) |
| H(1A)-C(1)-H(1B) | 109.5      |
| H(1A)-C(1)-H(1C) | 109.5      |
| H(1B)-C(1)-H(1C) | 109.5      |
| C(2)-C(1)-H(1A)  | 109.5      |
| C(2)-C(1)-H(1B)  | 109.5      |
| C(2)-C(1)-H(1C)  | 109.5      |
| O(1)-C(2)-C(1)   | 115.19(17) |
| O(1)-C(2)-C(3)   | 121.51(17) |
| C(3)-C(2)-C(1)   | 123.27(19) |
| C(2)-C(3)-H(3)   | 119.5      |
| C(2)-C(3)-C(4)   | 120.96(18) |
| C(4)-C(3)-H(3)   | 119.5      |
| O(2)-C(4)-C(3)   | 119.81(16) |
| O(2)-C(4)-C(5)   | 115.95(15) |
| C(3)-C(4)-C(5)   | 124.20(17) |
| C(6)-C(5)-C(4)   | 121.17(15) |
| C(6)-C(5)-C(17)  | 119.43(16) |
| C(17)-C(5)-C(4)  | 119.39(15) |
| C(5)-C(6)-H(6)   | 119.3      |
| C(7)-C(6)-C(5)   | 121.40(17) |
| C(7)-C(6)-H(6)   | 119.3      |
| C(6)-C(7)-H(7)   | 120.6      |
| C(6)-C(7)-C(8)   | 118.75(17) |
| C(8)-C(7)-H(7)   | 120.6      |
| C(7)-C(8)-C(9)   | 130.90(17) |
| C(7)-C(8)-C(16)  | 120.22(16) |

|                   |            |
|-------------------|------------|
| C(16)-C(8)-C(9)   | 108.88(16) |
| C(10)-C(9)-C(8)   | 131.05(18) |
| C(10)-C(9)-C(14)  | 120.65(18) |
| C(14)-C(9)-C(8)   | 108.28(16) |
| C(9)-C(10)-H(10)  | 120.7      |
| C(11)-C(10)-C(9)  | 118.6(2)   |
| C(11)-C(10)-H(10) | 120.7      |
| C(10)-C(11)-H(11) | 119.5      |
| C(12)-C(11)-C(10) | 121.0(2)   |
| C(12)-C(11)-H(11) | 119.5      |
| C(11)-C(12)-H(12) | 119.7      |
| C(11)-C(12)-C(13) | 120.6(2)   |
| C(13)-C(12)-H(12) | 119.7      |
| C(12)-C(13)-H(13) | 120.5      |
| C(12)-C(13)-C(14) | 119.0(2)   |
| C(14)-C(13)-H(13) | 120.5      |
| C(9)-C(14)-C(15)  | 111.29(15) |
| C(13)-C(14)-C(9)  | 120.17(18) |
| C(13)-C(14)-C(15) | 128.53(18) |
| C(14)-C(15)-C(16) | 100.94(14) |
| C(14)-C(15)-C(18) | 114.92(14) |
| C(14)-C(15)-C(29) | 114.18(15) |
| C(16)-C(15)-C(29) | 112.61(14) |
| C(18)-C(15)-C(16) | 113.62(13) |
| C(18)-C(15)-C(29) | 101.16(14) |
| C(8)-C(16)-C(15)  | 110.61(15) |
| C(17)-C(16)-C(8)  | 121.12(15) |
| C(17)-C(16)-C(15) | 128.27(16) |
| C(5)-C(17)-H(17)  | 120.5      |
| C(16)-C(17)-C(5)  | 119.05(16) |
| C(16)-C(17)-H(17) | 120.5      |
| C(19)-C(18)-C(15) | 128.10(17) |
| C(19)-C(18)-C(23) | 121.07(19) |
| C(23)-C(18)-C(15) | 110.83(17) |
| C(18)-C(19)-H(19) | 121.2      |
| C(18)-C(19)-C(20) | 117.6(2)   |
| C(20)-C(19)-H(19) | 121.2      |
| C(19)-C(20)-H(20) | 119.5      |

|                   |            |
|-------------------|------------|
| C(21)-C(20)-C(19) | 121.1(2)   |
| C(21)-C(20)-H(20) | 119.5      |
| C(20)-C(21)-H(21) | 119.4      |
| C(22)-C(21)-C(20) | 121.3(2)   |
| C(22)-C(21)-H(21) | 119.4      |
| C(21)-C(22)-H(22) | 120.7      |
| C(21)-C(22)-C(23) | 118.7(2)   |
| C(23)-C(22)-H(22) | 120.7      |
| C(18)-C(23)-C(22) | 120.3(2)   |
| C(18)-C(23)-C(24) | 108.61(18) |
| C(22)-C(23)-C(24) | 131.1(2)   |
| C(25)-C(24)-C(23) | 132.0(2)   |
| C(29)-C(24)-C(23) | 108.87(17) |
| C(29)-C(24)-C(25) | 119.1(2)   |
| C(24)-C(25)-H(25) | 120.4      |
| C(26)-C(25)-C(24) | 119.1(3)   |
| C(26)-C(25)-H(25) | 120.4      |
| C(25)-C(26)-H(26) | 119.4      |
| C(27)-C(26)-C(25) | 121.1(3)   |
| C(27)-C(26)-H(26) | 119.4      |
| C(26)-C(27)-H(27) | 119.6      |
| C(26)-C(27)-C(28) | 120.7(3)   |
| C(28)-C(27)-H(27) | 119.6      |
| C(27)-C(28)-H(28) | 120.5      |
| C(29)-C(28)-C(27) | 119.0(2)   |
| C(29)-C(28)-H(28) | 120.5      |
| C(24)-C(29)-C(15) | 110.48(17) |
| C(28)-C(29)-C(15) | 128.64(19) |
| C(28)-C(29)-C(24) | 120.88(19) |
| F(1)-B(1)-O(1)    | 108.49(19) |
| F(1)-B(1)-O(2)    | 107.99(19) |
| F(2)-B(1)-F(1)    | 111.5(2)   |
| F(2)-B(1)-O(1)    | 109.0(2)   |
| F(2)-B(1)-O(2)    | 108.8(2)   |
| O(1)-B(1)-O(2)    | 111.06(18) |

---

Symmetry transformations used to generate equivalent atoms:
